# Supplementary material for: Novel family of bis-pyrazole coordination complexes as potent antibacterial and antifungal agents
Source: Royal Society of Chemistry journal article supplement (doi:10.1039/d2ra03414j), 2022-01-01

**Electronic Supplementary Information (ESI)**

# **Novel Family of Bi-pyrazole Tripodal Based Coordination Complexes as Potent Antibacterial and Antifungal agents**

Youssef Draoui <sup>1</sup>, Smaail Radi <sup>\*,1</sup>, Amine Tanan <sup>1</sup>, Afaf Oulmidi <sup>1,2</sup>, Haralampos N. Miras <sup>3</sup>, Redouane Benabbes <sup>4</sup>, Sabir Ouahhoudo <sup>4</sup>, Samira Mamri <sup>4</sup>, Aurelian Rotaru <sup>5</sup>, Yann Garcia <sup>\*,2</sup>

<sup>1</sup> *LCAE, Department of Chemistry, Faculty of Science, University Mohamed I, P.O. Box 524, Oujda 60 000, Morocco.*

<sup>2</sup> *Institute of Condensed Matter and Nanosciences, Molecular Chemistry, Materials and Catalysis (IMCN/MOST), Université catholique de Louvain, Belgium*

<sup>3</sup> *School of Chemistry, Joseph Black Building, University of Glasgow, Glasgow G12 8QQ, UK.*

<sup>4</sup> *Laboratory of Biochemistry and Biotechnology, Department of Biology, Faculty of Science, University Mohamed I, P.O. Box 524, Oujda 60 000, Morocco.*

<sup>5</sup> *Department of Electrical Engineering and Computer Science & Research Center MANSiD, “Stefan cel Mare” University, University Street, No. 13, Suceava 720229, Romania*

Fax: +32-10472330 E-mail: [yann.garcia@uclouvain.be](mailto:yann.garcia@uclouvain.be) ; [s.radi@ump.ac.ma](mailto:s.radi@ump.ac.ma)

## Contents:

**Scheme S1.** Synthetic routes of **L**. (i) *MeI/t-BuOK/Et<sub>2</sub>O*. (ii) *Acetone/Na/Toluene*. (iii) *N<sub>2</sub>H<sub>4</sub>,H<sub>2</sub>O/EtOH*. (iv) *Br-CH<sub>2</sub>-CO<sub>2</sub>Et/t-BuOK/THF*. (v) *LiAlH<sub>4</sub>/THF*. (vi) *TsCl<sub>2</sub>/CH<sub>2</sub>Cl<sub>2</sub>*. (vii) *Propylamine/K<sub>2</sub>CO<sub>3</sub>/CH<sub>3</sub>CN*.

**Table S1.** Crystallographic and refinement data for **1-4**.

**Table S2.** Bond lengths [Å] and angles [°] for **1**.

**Table S3.** Bond lengths [Å] and angles [°] for **2**.

**Table S4.** Bond lengths [Å] and angles [°] for **3**.

**Table S5.** Bond lengths [Å] and angles [°] for **4**.

**Fig. S1** FT-IR spectroscopy comparison plot of **L** with **1 - 4**.

**Fig. S2** Diffuse reflectance spectroscopy comparison plot of **L** with **1 - 4**.

NMR of **L**

HRMS of **L**, **1**, **2**, **3** and **4**.

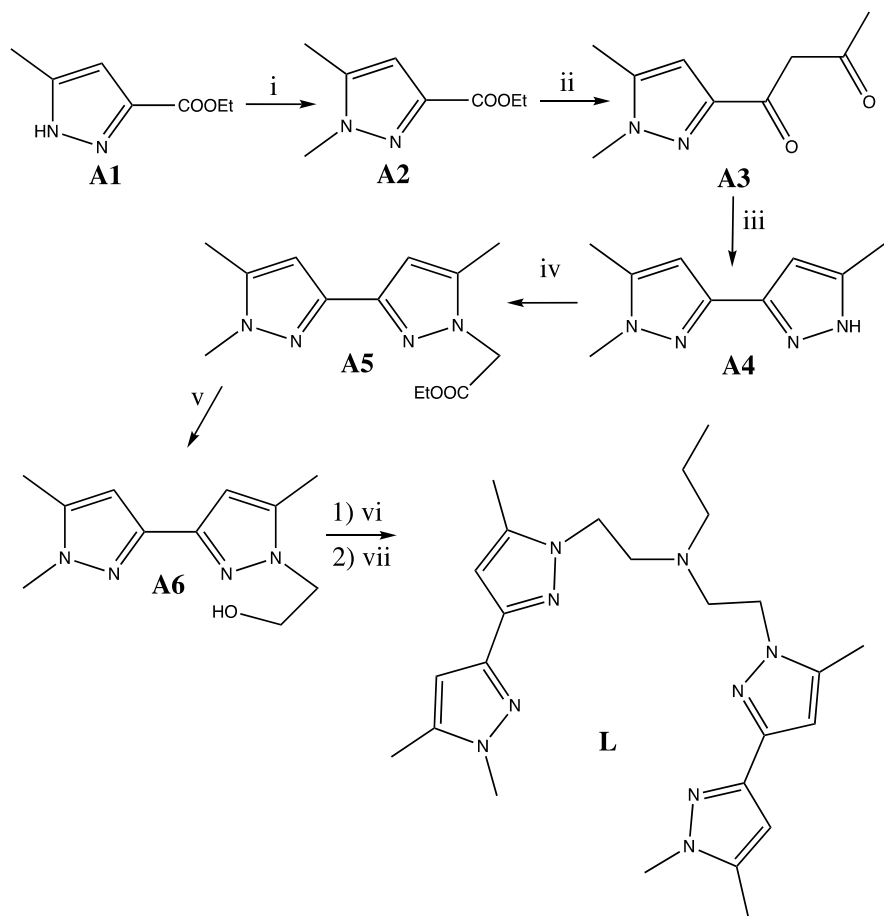

**Scheme S1.** Synthetic routes of **L**. (i)  $\text{MeI}/t\text{-BuOK}/\text{Et}_2\text{O}$ . (ii)  $\text{Acetone}/\text{Na}/\text{Toluene}$ . (iii)  $\text{N}_2\text{H}_4, \text{H}_2\text{O}/\text{EtOH}$ . (iv)  $\text{Br-CH}_2\text{-CO}_2\text{Et}/t\text{-BuOK}/\text{THF}$ . (v)  $\text{LiAlH}_4/\text{THF}$ . (vi)  $\text{TsCl}_2/\text{CH}_2\text{Cl}_2$ . (vii)  $\text{Propylamine}/\text{K}_2\text{CO}_3/\text{CH}_3\text{CN}$ .

**Table S1.** Crystallographic and refinement data for **1-4**.

|                                               | <b>1</b>                                                                                       | <b>2</b>                                                                         | <b>3</b>                                                                         | <b>4</b>                                                         |
|-----------------------------------------------|------------------------------------------------------------------------------------------------|----------------------------------------------------------------------------------|----------------------------------------------------------------------------------|------------------------------------------------------------------|
| Formula                                       | C <sub>51</sub> H <sub>74</sub> Cl <sub>8</sub> Cu <sub>4</sub> N <sub>18</sub> O <sub>3</sub> | C <sub>26</sub> H <sub>42</sub> Cl <sub>2</sub> N <sub>9</sub> NiO <sub>10</sub> | C <sub>26</sub> H <sub>43</sub> Cl <sub>2</sub> CoN <sub>9</sub> O <sub>10</sub> | C <sub>27</sub> H <sub>37</sub> FeN <sub>11</sub> S <sub>2</sub> |
| M <sub>r</sub>                                | 1525.08                                                                                        | 770.29                                                                           | 771.52                                                                           | 635.64                                                           |
| T [K]                                         | 150(2)                                                                                         | 150(2)                                                                           | 150(2)                                                                           | 150(2)                                                           |
| λ [Å]                                         | 0.71073                                                                                        | 0.71073                                                                          | 0.71073                                                                          | 0.71073                                                          |
| Crystal system                                | Triclinic                                                                                      | Monoclinic                                                                       | Monoclinic                                                                       | Monoclinic                                                       |
| Space group                                   | <i>P</i> -1                                                                                    | <i>P</i> 2 <sub>1</sub> / <i>c</i>                                               | <i>P</i> 2 <sub>1</sub> / <i>c</i>                                               | <i>P</i> 2 <sub>1</sub> / <i>c</i>                               |
| <i>a</i> [Å]                                  | 8.717(1)                                                                                       | 10.909(2)                                                                        | 10.900(3)                                                                        | 11.817(4)                                                        |
| <i>b</i> [Å]                                  | 13.818(2)                                                                                      | 21.821(5)                                                                        | 21.782(5)                                                                        | 21.125(7)                                                        |
| <i>c</i> [Å]                                  | 14.386(3)                                                                                      | 14.531(3)                                                                        | 14.480(3)                                                                        | 14.003(5)                                                        |
| α [°]                                         | 81.029(2)                                                                                      | 90                                                                               | 90                                                                               | 90                                                               |
| β [°]                                         | 73.073(2)                                                                                      | 98.616(3)                                                                        | 98.704(3)                                                                        | 111.244(5)                                                       |
| γ [°]                                         | 89.881(2)                                                                                      | 90                                                                               | 90                                                                               | 90                                                               |
| <i>V</i> [Å <sup>3</sup> ]                    | 1635.8(6)                                                                                      | 3420.2(1)                                                                        | 3398.1(1)                                                                        | 3258(2)                                                          |
| <i>Z</i>                                      | 1                                                                                              | 4                                                                                | 4                                                                                | 4                                                                |
| ρ <sub>c</sub> [g cm <sup>-3</sup> ]          | 1.548                                                                                          | 1.496                                                                            | 1.508                                                                            | 1.296                                                            |
| μ [mm <sup>-1</sup> ]                         | 1.664                                                                                          | 0.790                                                                            | 0.729                                                                            | 0.627                                                            |
| F(000)                                        | 782                                                                                            | 1612                                                                             | 1612                                                                             | 1336                                                             |
| Independent reflns                            | 6218                                                                                           | 6342                                                                             | 5598                                                                             | 4752                                                             |
| Abs. correction                               | Empirical                                                                                      | Empirical                                                                        | Empirical                                                                        | Empirical                                                        |
| Refinement method                             |                                                                                                | Full-matrix least-squares on F <sup>2</sup>                                      |                                                                                  |                                                                  |
| GoF on F <sup>2</sup>                         | 1.047                                                                                          | 1.022                                                                            | 1.042                                                                            | 1.034                                                            |
| Final R indices [ <i>I</i> > 2 σ( <i>I</i> )] | R <sub>1</sub> = 0.0256<br>wR <sub>2</sub> = 0.066                                             | R <sub>1</sub> = 0.0449<br>wR <sub>2</sub> = 0.1191                              | R <sub>1</sub> = 0.0495<br>wR <sub>2</sub> = 0.1208                              | R <sub>1</sub> = 0.0448<br>wR <sub>2</sub> = 0.1033              |
| R indices (all data)                          | R <sub>1</sub> = 0.0290<br>wR <sub>2</sub> = 0.069                                             | R <sub>1</sub> = 0.0524<br>wR <sub>2</sub> = 0.1261                              | R <sub>1</sub> = 0.0671<br>wR <sub>2</sub> = 0.1406                              | R <sub>1</sub> = 0.0768<br>wR <sub>2</sub> = 0.1171              |

**Table S2.** Bond lengths [Å] and angles [°] for **1**.

---

|              |          |
|--------------|----------|
| C(1)-N(6)    | 1.454(3) |
| C(1)-H(1A)   | 0.9800   |
| C(1)-H(1B)   | 0.9800   |
| C(1)-H(1C)   | 0.9800   |
| C(2)-C(4)    | 1.494(3) |
| C(2)-H(2A)   | 0.9800   |
| C(2)-H(2B)   | 0.9800   |
| C(2)-H(2C)   | 0.9800   |
| N(6)-N(5)    | 1.356(2) |
| N(6)-C(4)    | 1.358(3) |
| C(4)-C(5)    | 1.381(3) |
| C(5)-C(3)    | 1.395(3) |
| C(5)-H(5)    | 0.9500   |
| C(3)-N(5)    | 1.342(2) |
| C(3)-C(7)    | 1.453(3) |
| C(7)-N(7)    | 1.340(2) |
| C(7)-C(8)    | 1.398(3) |
| C(8)-C(9)    | 1.387(3) |
| C(8)-H(8)    | 0.9500   |
| C(9)-N(8)    | 1.360(2) |
| C(9)-C(10)   | 1.494(3) |
| C(10)-H(10A) | 0.9800   |
| C(10)-H(10B) | 0.9800   |
| C(10)-H(10C) | 0.9800   |
| N(8)-N(7)    | 1.348(2) |
| N(8)-C(12)   | 1.460(2) |
| C(12)-C(13)  | 1.526(3) |
| C(12)-H(12A) | 0.9900   |
| C(12)-H(12B) | 0.9900   |
| C(13)-N(9)   | 1.508(2) |

|              |            |
|--------------|------------|
| C(13)-H(13A) | 0.9900     |
| C(13)-H(13B) | 0.9900     |
| N(9)-C(15)   | 1.500(2)   |
| N(9)-C(18)   | 1.500(2)   |
| N(9)-Cu(2)   | 2.1200(16) |
| C(15)-C(16)  | 1.527(3)   |
| C(15)-H(15A) | 0.9900     |
| C(15)-H(15B) | 0.9900     |
| C(16)-C(17)  | 1.522(3)   |
| C(16)-H(16A) | 0.9900     |
| C(16)-H(16B) | 0.9900     |
| C(17)-H(17A) | 0.9800     |
| C(17)-H(17B) | 0.9800     |
| C(17)-H(17C) | 0.9800     |
| C(18)-C(19)  | 1.530(3)   |
| C(18)-H(18A) | 0.9900     |
| C(18)-H(18B) | 0.9900     |
| C(19)-N(4)   | 1.463(2)   |
| C(19)-H(19A) | 0.9900     |
| C(19)-H(19B) | 0.9900     |
| N(4)-C(21)   | 1.354(2)   |
| N(4)-N(3)    | 1.363(2)   |
| C(21)-C(23)  | 1.388(3)   |
| C(21)-C(22)  | 1.496(3)   |
| C(22)-H(22A) | 0.9800     |
| C(22)-H(22B) | 0.9800     |
| C(22)-H(22C) | 0.9800     |
| C(23)-C(24)  | 1.396(3)   |
| C(23)-H(23)  | 0.9500     |
| C(24)-N(3)   | 1.342(2)   |
| C(24)-C(25)  | 1.458(3)   |
| C(25)-N(2)   | 1.344(2)   |
| C(25)-C(26)  | 1.392(3)   |

|                  |            |
|------------------|------------|
| C(26)-C(27)      | 1.382(3)   |
| C(26)-H(26)      | 0.9500     |
| C(27)-N(1)       | 1.355(3)   |
| C(27)-C(28)      | 1.497(3)   |
| C(28)-H(28A)     | 0.9800     |
| C(28)-H(28B)     | 0.9800     |
| C(28)-H(28C)     | 0.9800     |
| N(1)-N(2)        | 1.361(2)   |
| N(1)-C(30)       | 1.457(3)   |
| C(30)-H(30A)     | 0.9800     |
| C(30)-H(30B)     | 0.9800     |
| C(30)-H(30C)     | 0.9800     |
| N(2)-Cu(1)       | 2.0132(16) |
| N(3)-Cu(1)       | 2.0202(15) |
| N(7)-Cu(2)       | 2.0393(16) |
| N(5)-Cu(2)       | 2.0522(16) |
| Cl(1)-Cu(1)      | 2.2072(6)  |
| Cl(2)-Cu(1)      | 2.2062(6)  |
| Cl(3)-Cu(2)      | 2.3419(6)  |
| Cl(4)-Cu(2)      | 2.3763(6)  |
| C(31)-O(1B)      | 1.087(10)  |
|                  |            |
| N(6)-C(1)-H(1A)  | 109.5      |
| N(6)-C(1)-H(1B)  | 109.5      |
| H(1A)-C(1)-H(1B) | 109.5      |
| N(6)-C(1)-H(1C)  | 109.5      |
| H(1A)-C(1)-H(1C) | 109.5      |
| H(1B)-C(1)-H(1C) | 109.5      |
| C(4)-C(2)-H(2A)  | 109.5      |
| C(4)-C(2)-H(2B)  | 109.5      |
| H(2A)-C(2)-H(2B) | 109.5      |
| C(4)-C(2)-H(2C)  | 109.5      |
| H(2A)-C(2)-H(2C) | 109.5      |

|                     |            |
|---------------------|------------|
| H(2B)-C(2)-H(2C)    | 109.5      |
| N(5)-N(6)-C(4)      | 110.88(16) |
| N(5)-N(6)-C(1)      | 120.72(16) |
| C(4)-N(6)-C(1)      | 128.39(17) |
| N(6)-C(4)-C(5)      | 107.34(17) |
| N(6)-C(4)-C(2)      | 122.11(19) |
| C(5)-C(4)-C(2)      | 130.55(19) |
| C(4)-C(5)-C(3)      | 105.21(17) |
| C(4)-C(5)-H(5)      | 127.4      |
| C(3)-C(5)-H(5)      | 127.4      |
| N(5)-C(3)-C(5)      | 110.76(17) |
| N(5)-C(3)-C(7)      | 114.18(16) |
| C(5)-C(3)-C(7)      | 134.97(18) |
| N(7)-C(7)-C(8)      | 110.29(17) |
| N(7)-C(7)-C(3)      | 113.67(16) |
| C(8)-C(7)-C(3)      | 135.96(17) |
| C(9)-C(8)-C(7)      | 105.52(16) |
| C(9)-C(8)-H(8)      | 127.2      |
| C(7)-C(8)-H(8)      | 127.2      |
| N(8)-C(9)-C(8)      | 106.65(16) |
| N(8)-C(9)-C(10)     | 121.81(18) |
| C(8)-C(9)-C(10)     | 131.51(17) |
| C(9)-C(10)-H(10A)   | 109.5      |
| C(9)-C(10)-H(10B)   | 109.5      |
| H(10A)-C(10)-H(10B) | 109.5      |
| C(9)-C(10)-H(10C)   | 109.5      |
| H(10A)-C(10)-H(10C) | 109.5      |
| H(10B)-C(10)-H(10C) | 109.5      |
| N(7)-N(8)-C(9)      | 111.22(16) |
| N(7)-N(8)-C(12)     | 119.88(15) |
| C(9)-N(8)-C(12)     | 128.87(16) |
| N(8)-C(12)-C(13)    | 112.93(15) |
| N(8)-C(12)-H(12A)   | 109.0      |



|                     |            |
|---------------------|------------|
| C(13)-C(12)-H(12A)  | 109.0      |
| N(8)-C(12)-H(12B)   | 109.0      |
| C(13)-C(12)-H(12B)  | 109.0      |
| H(12A)-C(12)-H(12B) | 107.8      |
| N(9)-C(13)-C(12)    | 117.43(16) |
| N(9)-C(13)-H(13A)   | 107.9      |
| C(12)-C(13)-H(13A)  | 107.9      |
| N(9)-C(13)-H(13B)   | 107.9      |
| C(12)-C(13)-H(13B)  | 107.9      |
| H(13A)-C(13)-H(13B) | 107.2      |
| C(15)-N(9)-C(18)    | 111.58(14) |
| C(15)-N(9)-C(13)    | 112.12(14) |
| C(18)-N(9)-C(13)    | 104.54(14) |
| C(15)-N(9)-Cu(2)    | 109.09(11) |
| C(18)-N(9)-Cu(2)    | 113.53(11) |
| C(13)-N(9)-Cu(2)    | 105.82(11) |
| N(9)-C(15)-C(16)    | 116.44(15) |
| N(9)-C(15)-H(15A)   | 108.2      |
| C(16)-C(15)-H(15A)  | 108.2      |
| N(9)-C(15)-H(15B)   | 108.2      |
| C(16)-C(15)-H(15B)  | 108.2      |
| H(15A)-C(15)-H(15B) | 107.3      |
| C(17)-C(16)-C(15)   | 110.70(16) |
| C(17)-C(16)-H(16A)  | 109.5      |
| C(15)-C(16)-H(16A)  | 109.5      |
| C(17)-C(16)-H(16B)  | 109.5      |
| C(15)-C(16)-H(16B)  | 109.5      |
| H(16A)-C(16)-H(16B) | 108.1      |
| C(16)-C(17)-H(17A)  | 109.5      |
| C(16)-C(17)-H(17B)  | 109.5      |
| H(17A)-C(17)-H(17B) | 109.5      |
| C(16)-C(17)-H(17C)  | 109.5      |
| H(17A)-C(17)-H(17C) | 109.5      |

|                     |            |
|---------------------|------------|
| H(17B)-C(17)-H(17C) | 109.5      |
| N(9)-C(18)-C(19)    | 114.80(15) |
| N(9)-C(18)-H(18A)   | 108.6      |
| C(19)-C(18)-H(18A)  | 108.6      |
| N(9)-C(18)-H(18B)   | 108.6      |
| C(19)-C(18)-H(18B)  | 108.6      |
| H(18A)-C(18)-H(18B) | 107.5      |
| N(4)-C(19)-C(18)    | 108.75(15) |
| N(4)-C(19)-H(19A)   | 109.9      |
| C(18)-C(19)-H(19A)  | 109.9      |
| N(4)-C(19)-H(19B)   | 109.9      |
| C(18)-C(19)-H(19B)  | 109.9      |
| H(19A)-C(19)-H(19B) | 108.3      |
| C(21)-N(4)-N(3)     | 110.87(15) |
| C(21)-N(4)-C(19)    | 128.54(16) |
| N(3)-N(4)-C(19)     | 120.40(15) |
| N(4)-C(21)-C(23)    | 107.05(16) |
| N(4)-C(21)-C(22)    | 122.79(18) |
| C(23)-C(21)-C(22)   | 130.16(18) |
| C(21)-C(22)-H(22A)  | 109.5      |
| C(21)-C(22)-H(22B)  | 109.5      |
| H(22A)-C(22)-H(22B) | 109.5      |
| C(21)-C(22)-H(22C)  | 109.5      |
| H(22A)-C(22)-H(22C) | 109.5      |
| H(22B)-C(22)-H(22C) | 109.5      |
| C(21)-C(23)-C(24)   | 105.59(17) |
| C(21)-C(23)-H(23)   | 127.2      |
| C(24)-C(23)-H(23)   | 127.2      |
| N(3)-C(24)-C(23)    | 110.40(16) |
| N(3)-C(24)-C(25)    | 114.82(16) |
| C(23)-C(24)-C(25)   | 134.73(17) |
| N(2)-C(25)-C(26)    | 110.44(16) |
| N(2)-C(25)-C(24)    | 114.94(16) |

|                     |            |
|---------------------|------------|
| C(26)-C(25)-C(24)   | 134.56(17) |
| C(27)-C(26)-C(25)   | 105.58(17) |
| C(27)-C(26)-H(26)   | 127.2      |
| C(25)-C(26)-H(26)   | 127.2      |
| N(1)-C(27)-C(26)    | 107.33(16) |
| N(1)-C(27)-C(28)    | 122.33(18) |
| C(26)-C(27)-C(28)   | 130.34(18) |
| C(27)-C(28)-H(28A)  | 109.5      |
| C(27)-C(28)-H(28B)  | 109.5      |
| H(28A)-C(28)-H(28B) | 109.5      |
| C(27)-C(28)-H(28C)  | 109.5      |
| H(28A)-C(28)-H(28C) | 109.5      |
| H(28B)-C(28)-H(28C) | 109.5      |
| C(27)-N(1)-N(2)     | 110.68(15) |
| C(27)-N(1)-C(30)    | 128.28(16) |
| N(2)-N(1)-C(30)     | 121.03(16) |
| N(1)-C(30)-H(30A)   | 109.5      |
| N(1)-C(30)-H(30B)   | 109.5      |
| H(30A)-C(30)-H(30B) | 109.5      |
| N(1)-C(30)-H(30C)   | 109.5      |
| H(30A)-C(30)-H(30C) | 109.5      |
| H(30B)-C(30)-H(30C) | 109.5      |
| C(25)-N(2)-N(1)     | 105.98(15) |
| C(25)-N(2)-Cu(1)    | 115.02(12) |
| N(1)-N(2)-Cu(1)     | 138.85(13) |
| C(24)-N(3)-N(4)     | 106.07(14) |
| C(24)-N(3)-Cu(1)    | 115.05(12) |
| N(4)-N(3)-Cu(1)     | 138.88(12) |
| C(7)-N(7)-N(8)      | 106.32(15) |
| C(7)-N(7)-Cu(2)     | 117.68(13) |
| N(8)-N(7)-Cu(2)     | 135.86(12) |
| C(3)-N(5)-N(6)      | 105.81(15) |
| C(3)-N(5)-Cu(2)     | 116.85(13) |

|                   |            |
|-------------------|------------|
| N(6)-N(5)-Cu(2)   | 137.18(13) |
| N(2)-Cu(1)-N(3)   | 79.84(6)   |
| N(2)-Cu(1)-Cl(2)  | 101.39(5)  |
| N(3)-Cu(1)-Cl(2)  | 138.75(5)  |
| N(2)-Cu(1)-Cl(1)  | 142.30(5)  |
| N(3)-Cu(1)-Cl(1)  | 101.94(5)  |
| Cl(2)-Cu(1)-Cl(1) | 101.10(2)  |
| N(7)-Cu(2)-N(5)   | 76.79(6)   |
| N(7)-Cu(2)-N(9)   | 87.43(6)   |
| N(5)-Cu(2)-N(9)   | 164.07(6)  |
| N(7)-Cu(2)-Cl(3)  | 130.03(5)  |
| N(5)-Cu(2)-Cl(3)  | 91.24(5)   |
| N(9)-Cu(2)-Cl(3)  | 97.46(5)   |
| N(7)-Cu(2)-Cl(4)  | 115.07(5)  |
| N(5)-Cu(2)-Cl(4)  | 93.73(5)   |
| N(9)-Cu(2)-Cl(4)  | 94.87(5)   |
| Cl(3)-Cu(2)-Cl(4) | 113.98(2)  |

**Table S3.** Bond lengths [Å] and angles [°] for **2**.

|            |          |
|------------|----------|
| C(1)-N(1)  | 1.458(3) |
| C(1)-H(1A) | 0.9800   |
| C(1)-H(1B) | 0.9800   |
| C(1)-H(1C) | 0.9800   |
| C(2)-C(3)  | 1.499(4) |
| C(2)-H(2A) | 0.9800   |
| C(2)-H(2B) | 0.9800   |
| C(2)-H(2C) | 0.9800   |
| C(3)-N(1)  | 1.358(3) |
| C(3)-C(4)  | 1.382(4) |
| C(4)-C(5)  | 1.402(3) |

|              |          |
|--------------|----------|
| C(4)-H(4)    | 0.9500   |
| C(5)-N(2)    | 1.345(3) |
| C(5)-C(6)    | 1.455(3) |
| C(6)-N(3)    | 1.347(3) |
| C(6)-C(7)    | 1.400(3) |
| C(7)-C(8)    | 1.384(4) |
| C(7)-H(7)    | 0.9500   |
| C(8)-N(4)    | 1.365(3) |
| C(8)-C(9)    | 1.493(3) |
| C(9)-H(9A)   | 0.9800   |
| C(9)-H(9B)   | 0.9800   |
| C(9)-H(9C)   | 0.9800   |
| C(10)-N(4)   | 1.461(3) |
| C(10)-C(11)  | 1.532(3) |
| C(10)-H(10A) | 0.9900   |
| C(10)-H(10B) | 0.9900   |
| C(11)-N(5)   | 1.477(3) |
| C(11)-H(11A) | 0.9900   |
| C(11)-H(11B) | 0.9900   |
| C(12)-N(5)   | 1.496(3) |
| C(12)-C(13)  | 1.531(3) |
| C(12)-H(12A) | 0.9900   |
| C(12)-H(12B) | 0.9900   |
| C(13)-C(14)  | 1.521(4) |
| C(13)-H(13A) | 0.9900   |
| C(13)-H(13B) | 0.9900   |
| C(14)-H(14A) | 0.9800   |
| C(14)-H(14B) | 0.9800   |
| C(14)-H(14C) | 0.9800   |
| C(15)-N(5)   | 1.501(3) |
| C(15)-C(16)  | 1.531(3) |
| C(15)-H(15A) | 0.9900   |
| C(15)-H(15B) | 0.9900   |

|              |            |
|--------------|------------|
| C(16)-N(6)   | 1.456(3)   |
| C(16)-H(16A) | 0.9900     |
| C(16)-H(16B) | 0.9900     |
| C(17)-C(18)  | 1.495(3)   |
| C(17)-H(17A) | 0.9800     |
| C(17)-H(17B) | 0.9800     |
| C(17)-H(17C) | 0.9800     |
| C(18)-N(6)   | 1.365(3)   |
| C(18)-C(19)  | 1.382(4)   |
| C(19)-C(20)  | 1.399(3)   |
| C(19)-H(19)  | 0.9500     |
| C(20)-N(7)   | 1.344(3)   |
| C(20)-C(21)  | 1.455(3)   |
| C(21)-N(8)   | 1.342(3)   |
| C(21)-C(22)  | 1.401(3)   |
| C(22)-C(23)  | 1.388(4)   |
| C(22)-H(22)  | 0.9500     |
| C(23)-N(9)   | 1.356(3)   |
| C(23)-C(24)  | 1.499(3)   |
| C(24)-H(24A) | 0.9800     |
| C(24)-H(24B) | 0.9800     |
| C(24)-H(24C) | 0.9800     |
| C(25)-N(9)   | 1.457(3)   |
| C(25)-H(25A) | 0.9800     |
| C(25)-H(25B) | 0.9800     |
| C(25)-H(25C) | 0.9800     |
| C(26)-O(10)  | 1.439(3)   |
| C(26)-H(26A) | 0.9800     |
| C(26)-H(26B) | 0.9800     |
| C(26)-H(26C) | 0.9800     |
| N(1)-N(2)    | 1.363(3)   |
| N(2)-Ni(1)   | 2.1064(19) |
| N(3)-N(4)    | 1.361(3)   |

|                  |            |
|------------------|------------|
| N(3)-Ni(1)       | 2.1044(19) |
| N(6)-N(7)        | 1.364(3)   |
| N(7)-Ni(1)       | 2.1175(19) |
| N(8)-N(9)        | 1.366(3)   |
| N(8)-Ni(1)       | 2.1282(19) |
| Ni(1)-O(10)      | 2.0920(16) |
| Ni(1)-O(9)       | 2.0995(18) |
| O(1)-Cl(1)       | 1.446(9)   |
| O(2)-Cl(1)       | 1.450(7)   |
| O(3)-Cl(1)       | 1.454(9)   |
| O(4)-Cl(1)       | 1.365(7)   |
| O(5)-Cl(2)       | 1.490(9)   |
| O(6)-Cl(2)       | 1.375(9)   |
| O(7)-Cl(2)       | 1.408(9)   |
| O(8)-Cl(2)       | 1.429(14)  |
| O(9)-H(61)       | 0.869(17)  |
| O(9)-H(60)       | 0.88(4)    |
| Cl(1')-O(2')     | 1.300(12)  |
| Cl(1')-O(1')     | 1.366(11)  |
| Cl(1')-O(4')     | 1.411(10)  |
| Cl(1')-O(3')     | 1.430(9)   |
| Cl(2')-O(6')     | 1.337(12)  |
| Cl(2')-O(5')     | 1.338(11)  |
| Cl(2')-O(7')     | 1.395(9)   |
| Cl(2')-O(8')     | 1.418(14)  |
|                  |            |
| N(1)-C(1)-H(1A)  | 109.5      |
| N(1)-C(1)-H(1B)  | 109.5      |
| H(1A)-C(1)-H(1B) | 109.5      |
| N(1)-C(1)-H(1C)  | 109.5      |
| H(1A)-C(1)-H(1C) | 109.5      |
| H(1B)-C(1)-H(1C) | 109.5      |
| C(3)-C(2)-H(2A)  | 109.5      |

|                    |          |
|--------------------|----------|
| C(3)-C(2)-H(2B)    | 109.5    |
| H(2A)-C(2)-H(2B)   | 109.5    |
| C(3)-C(2)-H(2C)    | 109.5    |
| H(2A)-C(2)-H(2C)   | 109.5    |
| H(2B)-C(2)-H(2C)   | 109.5    |
| N(1)-C(3)-C(4)     | 107.2(2) |
| N(1)-C(3)-C(2)     | 121.8(2) |
| C(4)-C(3)-C(2)     | 131.0(2) |
| C(3)-C(4)-C(5)     | 105.3(2) |
| C(3)-C(4)-H(4)     | 127.4    |
| C(5)-C(4)-H(4)     | 127.4    |
| N(2)-C(5)-C(4)     | 110.8(2) |
| N(2)-C(5)-C(6)     | 116.4(2) |
| C(4)-C(5)-C(6)     | 132.8(2) |
| N(3)-C(6)-C(7)     | 111.3(2) |
| N(3)-C(6)-C(5)     | 116.4(2) |
| C(7)-C(6)-C(5)     | 132.2(2) |
| C(8)-C(7)-C(6)     | 105.1(2) |
| C(8)-C(7)-H(7)     | 127.5    |
| C(6)-C(7)-H(7)     | 127.5    |
| N(4)-C(8)-C(7)     | 107.0(2) |
| N(4)-C(8)-C(9)     | 122.7(2) |
| C(7)-C(8)-C(9)     | 130.3(2) |
| C(8)-C(9)-H(9A)    | 109.5    |
| C(8)-C(9)-H(9B)    | 109.5    |
| H(9A)-C(9)-H(9B)   | 109.5    |
| C(8)-C(9)-H(9C)    | 109.5    |
| H(9A)-C(9)-H(9C)   | 109.5    |
| H(9B)-C(9)-H(9C)   | 109.5    |
| N(4)-C(10)-C(11)   | 111.6(2) |
| N(4)-C(10)-H(10A)  | 109.3    |
| C(11)-C(10)-H(10A) | 109.3    |
| N(4)-C(10)-H(10B)  | 109.3    |



|                     |            |
|---------------------|------------|
| C(11)-C(10)-H(10B)  | 109.3      |
| H(10A)-C(10)-H(10B) | 108.0      |
| N(5)-C(11)-C(10)    | 114.08(19) |
| N(5)-C(11)-H(11A)   | 108.7      |
| C(10)-C(11)-H(11A)  | 108.7      |
| N(5)-C(11)-H(11B)   | 108.7      |
| C(10)-C(11)-H(11B)  | 108.7      |
| H(11A)-C(11)-H(11B) | 107.6      |
| N(5)-C(12)-C(13)    | 116.7(2)   |
| N(5)-C(12)-H(12A)   | 108.1      |
| C(13)-C(12)-H(12A)  | 108.1      |
| N(5)-C(12)-H(12B)   | 108.1      |
| C(13)-C(12)-H(12B)  | 108.1      |
| H(12A)-C(12)-H(12B) | 107.3      |
| C(14)-C(13)-C(12)   | 111.1(2)   |
| C(14)-C(13)-H(13A)  | 109.4      |
| C(12)-C(13)-H(13A)  | 109.4      |
| C(14)-C(13)-H(13B)  | 109.4      |
| C(12)-C(13)-H(13B)  | 109.4      |
| H(13A)-C(13)-H(13B) | 108.0      |
| C(13)-C(14)-H(14A)  | 109.5      |
| C(13)-C(14)-H(14B)  | 109.5      |
| H(14A)-C(14)-H(14B) | 109.5      |
| C(13)-C(14)-H(14C)  | 109.5      |
| H(14A)-C(14)-H(14C) | 109.5      |
| H(14B)-C(14)-H(14C) | 109.5      |
| N(5)-C(15)-C(16)    | 115.7(2)   |
| N(5)-C(15)-H(15A)   | 108.3      |
| C(16)-C(15)-H(15A)  | 108.3      |
| N(5)-C(15)-H(15B)   | 108.3      |
| C(16)-C(15)-H(15B)  | 108.3      |
| H(15A)-C(15)-H(15B) | 107.4      |
| N(6)-C(16)-C(15)    | 114.6(2)   |

|                     |          |
|---------------------|----------|
| N(6)-C(16)-H(16A)   | 108.6    |
| C(15)-C(16)-H(16A)  | 108.6    |
| N(6)-C(16)-H(16B)   | 108.6    |
| C(15)-C(16)-H(16B)  | 108.6    |
| H(16A)-C(16)-H(16B) | 107.6    |
| C(18)-C(17)-H(17A)  | 109.5    |
| C(18)-C(17)-H(17B)  | 109.5    |
| H(17A)-C(17)-H(17B) | 109.5    |
| C(18)-C(17)-H(17C)  | 109.5    |
| H(17A)-C(17)-H(17C) | 109.5    |
| H(17B)-C(17)-H(17C) | 109.5    |
| N(6)-C(18)-C(19)    | 107.0(2) |
| N(6)-C(18)-C(17)    | 122.9(2) |
| C(19)-C(18)-C(17)   | 130.0(2) |
| C(18)-C(19)-C(20)   | 105.6(2) |
| C(18)-C(19)-H(19)   | 127.2    |
| C(20)-C(19)-H(19)   | 127.2    |
| N(7)-C(20)-C(19)    | 110.8(2) |
| N(7)-C(20)-C(21)    | 117.3(2) |
| C(19)-C(20)-C(21)   | 131.8(2) |
| N(8)-C(21)-C(22)    | 111.5(2) |
| N(8)-C(21)-C(20)    | 116.8(2) |
| C(22)-C(21)-C(20)   | 131.8(2) |
| C(23)-C(22)-C(21)   | 104.8(2) |
| C(23)-C(22)-H(22)   | 127.6    |
| C(21)-C(22)-H(22)   | 127.6    |
| N(9)-C(23)-C(22)    | 107.3(2) |
| N(9)-C(23)-C(24)    | 123.1(2) |
| C(22)-C(23)-C(24)   | 129.6(2) |
| C(23)-C(24)-H(24A)  | 109.5    |
| C(23)-C(24)-H(24B)  | 109.5    |
| H(24A)-C(24)-H(24B) | 109.5    |
| C(23)-C(24)-H(24C)  | 109.5    |

|                     |            |
|---------------------|------------|
| H(24A)-C(24)-H(24C) | 109.5      |
| H(24B)-C(24)-H(24C) | 109.5      |
| N(9)-C(25)-H(25A)   | 109.5      |
| N(9)-C(25)-H(25B)   | 109.5      |
| H(25A)-C(25)-H(25B) | 109.5      |
| N(9)-C(25)-H(25C)   | 109.5      |
| H(25A)-C(25)-H(25C) | 109.5      |
| H(25B)-C(25)-H(25C) | 109.5      |
| O(10)-C(26)-H(26A)  | 109.5      |
| O(10)-C(26)-H(26B)  | 109.5      |
| H(26A)-C(26)-H(26B) | 109.5      |
| O(10)-C(26)-H(26C)  | 109.5      |
| H(26A)-C(26)-H(26C) | 109.5      |
| H(26B)-C(26)-H(26C) | 109.5      |
| C(3)-N(1)-N(2)      | 111.24(19) |
| C(3)-N(1)-C(1)      | 128.2(2)   |
| N(2)-N(1)-C(1)      | 120.6(2)   |
| C(5)-N(2)-N(1)      | 105.43(18) |
| C(5)-N(2)-Ni(1)     | 114.27(15) |
| N(1)-N(2)-Ni(1)     | 139.87(15) |
| C(6)-N(3)-N(4)      | 105.08(18) |
| C(6)-N(3)-Ni(1)     | 114.44(15) |
| N(4)-N(3)-Ni(1)     | 140.45(15) |
| N(3)-N(4)-C(8)      | 111.44(19) |
| N(3)-N(4)-C(10)     | 122.03(19) |
| C(8)-N(4)-C(10)     | 125.9(2)   |
| C(11)-N(5)-C(12)    | 110.34(19) |
| C(11)-N(5)-C(15)    | 112.2(2)   |
| C(12)-N(5)-C(15)    | 110.30(18) |
| N(7)-N(6)-C(18)     | 110.98(19) |
| N(7)-N(6)-C(16)     | 121.60(19) |
| C(18)-N(6)-C(16)    | 127.4(2)   |
| C(20)-N(7)-N(6)     | 105.65(18) |

|                   |            |
|-------------------|------------|
| C(20)-N(7)-Ni(1)  | 113.75(15) |
| N(6)-N(7)-Ni(1)   | 140.16(15) |
| C(21)-N(8)-N(9)   | 105.04(18) |
| C(21)-N(8)-Ni(1)  | 113.76(15) |
| N(9)-N(8)-Ni(1)   | 141.03(15) |
| C(23)-N(9)-N(8)   | 111.42(19) |
| C(23)-N(9)-C(25)  | 127.3(2)   |
| N(8)-N(9)-C(25)   | 121.10(19) |
| O(10)-Ni(1)-O(9)  | 86.83(7)   |
| O(10)-Ni(1)-N(3)  | 86.24(7)   |
| O(9)-Ni(1)-N(3)   | 171.31(7)  |
| O(10)-Ni(1)-N(2)  | 93.42(7)   |
| O(9)-Ni(1)-N(2)   | 97.10(7)   |
| N(3)-Ni(1)-N(2)   | 78.10(7)   |
| O(10)-Ni(1)-N(7)  | 93.44(7)   |
| O(9)-Ni(1)-N(7)   | 87.09(7)   |
| N(3)-Ni(1)-N(7)   | 98.54(7)   |
| N(2)-Ni(1)-N(7)   | 172.15(7)  |
| O(10)-Ni(1)-N(8)  | 171.62(7)  |
| O(9)-Ni(1)-N(8)   | 93.39(7)   |
| N(3)-Ni(1)-N(8)   | 94.23(7)   |
| N(2)-Ni(1)-N(8)   | 94.87(8)   |
| N(7)-Ni(1)-N(8)   | 78.22(8)   |
| Ni(1)-O(9)-H(61)  | 106.5(19)  |
| Ni(1)-O(9)-H(60)  | 110(2)     |
| H(61)-O(9)-H(60)  | 100(3)     |
| C(26)-O(10)-Ni(1) | 121.97(15) |
| O(4)-Cl(1)-O(1)   | 100.2(6)   |
| O(4)-Cl(1)-O(2)   | 104.0(7)   |
| O(1)-Cl(1)-O(2)   | 118.7(8)   |
| O(4)-Cl(1)-O(3)   | 104.2(6)   |
| O(1)-Cl(1)-O(3)   | 105.3(6)   |
| O(2)-Cl(1)-O(3)   | 121.3(7)   |

|                    |           |
|--------------------|-----------|
| O(6)-Cl(2)-O(7)    | 109.5(9)  |
| O(6)-Cl(2)-O(8)    | 108.8(14) |
| O(7)-Cl(2)-O(8)    | 104.2(12) |
| O(6)-Cl(2)-O(5)    | 116.3(6)  |
| O(7)-Cl(2)-O(5)    | 105.1(6)  |
| O(8)-Cl(2)-O(5)    | 112.2(14) |
| O(2')-Cl(1')-O(1') | 96.4(12)  |
| O(2')-Cl(1')-O(4') | 113.8(14) |
| O(1')-Cl(1')-O(4') | 118.8(9)  |
| O(2')-Cl(1')-O(3') | 101.5(10) |
| O(1')-Cl(1')-O(3') | 119.4(9)  |
| O(4')-Cl(1')-O(3') | 105.5(7)  |
| O(6')-Cl(2')-O(5') | 113.7(13) |
| O(6')-Cl(2')-O(7') | 91.3(11)  |
| O(5')-Cl(2')-O(7') | 109.1(14) |
| O(6')-Cl(2')-O(8') | 114.5(16) |
| O(5')-Cl(2')-O(8') | 116.9(11) |
| O(7')-Cl(2')-O(8') | 107.9(13) |

**Table S4.** Bond lengths [Å] and angles [°] for **3**.

|            |          |
|------------|----------|
| C(1)-N(2)  | 1.453(4) |
| C(1)-H(1A) | 0.9800   |
| C(1)-H(1B) | 0.9800   |
| C(1)-H(1C) | 0.9800   |
| C(2)-C(3)  | 1.490(5) |
| C(2)-H(2A) | 0.9800   |
| C(2)-H(2B) | 0.9800   |
| C(2)-H(2C) | 0.9800   |
| C(3)-N(2)  | 1.355(4) |
| C(3)-C(4)  | 1.378(5) |

|              |          |
|--------------|----------|
| C(4)-C(5)    | 1.394(4) |
| C(4)-H(4)    | 0.9500   |
| C(5)-N(1)    | 1.341(4) |
| C(5)-C(6)    | 1.449(4) |
| C(6)-N(3)    | 1.346(4) |
| C(6)-C(7)    | 1.392(4) |
| C(7)-C(8)    | 1.374(5) |
| C(7)-H(7)    | 0.9500   |
| C(8)-N(4)    | 1.366(4) |
| C(8)-C(9)    | 1.487(4) |
| C(9)-H(9A)   | 0.9800   |
| C(9)-H(9B)   | 0.9800   |
| C(9)-H(9C)   | 0.9800   |
| C(10)-N(4)   | 1.455(4) |
| C(10)-C(11)  | 1.530(4) |
| C(10)-H(10A) | 0.9900   |
| C(10)-H(10B) | 0.9900   |
| C(11)-N(5)   | 1.497(4) |
| C(11)-H(11A) | 0.9900   |
| C(11)-H(11B) | 0.9900   |
| C(12)-C(13)  | 1.521(4) |
| C(12)-H(12A) | 0.9800   |
| C(12)-H(12B) | 0.9800   |
| C(12)-H(12C) | 0.9800   |
| C(13)-C(14)  | 1.526(4) |
| C(13)-H(13A) | 0.9900   |
| C(13)-H(13B) | 0.9900   |
| C(14)-N(5)   | 1.491(4) |
| C(14)-H(14A) | 0.9900   |
| C(14)-H(14B) | 0.9900   |
| C(15)-N(5)   | 1.475(4) |
| C(15)-C(16)  | 1.525(4) |
| C(15)-H(15A) | 0.9900   |

|              |          |
|--------------|----------|
| C(15)-H(15B) | 0.9900   |
| C(16)-N(6)   | 1.450(4) |
| C(16)-H(16A) | 0.9900   |
| C(16)-H(16B) | 0.9900   |
| C(17)-N(6)   | 1.360(4) |
| C(17)-C(19)  | 1.371(5) |
| C(17)-C(18)  | 1.490(4) |
| C(18)-H(18A) | 0.9800   |
| C(18)-H(18B) | 0.9800   |
| C(18)-H(18C) | 0.9800   |
| C(19)-C(20)  | 1.393(4) |
| C(19)-H(19)  | 0.9500   |
| C(20)-N(7)   | 1.339(4) |
| C(20)-C(21)  | 1.452(4) |
| C(21)-N(8)   | 1.342(4) |
| C(21)-C(22)  | 1.390(4) |
| C(22)-C(23)  | 1.369(5) |
| C(22)-H(22)  | 0.9500   |
| C(23)-N(9)   | 1.345(4) |
| C(23)-C(24)  | 1.507(5) |
| C(24)-H(24A) | 0.9800   |
| C(24)-H(24B) | 0.9800   |
| C(24)-H(24C) | 0.9800   |
| C(25)-N(9)   | 1.458(4) |
| C(25)-H(25A) | 0.9800   |
| C(25)-H(25B) | 0.9800   |
| C(25)-H(25C) | 0.9800   |
| C(26)-O(5)   | 1.435(4) |
| C(26)-H(26A) | 0.9800   |
| C(26)-H(26B) | 0.9800   |
| C(26)-H(26C) | 0.9800   |
| N(1)-N(2)    | 1.358(3) |
| N(1)-Co(1)   | 2.137(3) |

|              |           |
|--------------|-----------|
| N(3)-N(4)    | 1.360(3)  |
| N(3)-Co(1)   | 2.159(2)  |
| N(6)-N(7)    | 1.360(3)  |
| N(7)-Co(1)   | 2.123(2)  |
| N(8)-N(9)    | 1.357(3)  |
| N(8)-Co(1)   | 2.155(3)  |
| Cl(1A)-O(2A) | 1.282(18) |
| Cl(1A)-O(3A) | 1.390(11) |
| Cl(1A)-O(1A) | 1.490(15) |
| Cl(1A)-O(4A) | 1.505(13) |
| Cl(2A)-O(7B) | 1.166(16) |
| Cl(2A)-O(6A) | 1.320(14) |
| Cl(2A)-O(8A) | 1.371(10) |
| Cl(2A)-O(6B) | 1.456(14) |
| Cl(2A)-O(9A) | 1.480(14) |
| Cl(2A)-O(9B) | 1.513(16) |
| Cl(2A)-O(7A) | 1.539(9)  |
| Cl(2A)-O(8B) | 1.697(14) |
| O(5)-Co(1)   | 2.108(2)  |
| O(5)-H(12)   | 0.84(5)   |
| O(6A)-O(6B)  | 0.628(17) |
| O(6A)-Cl(2B) | 1.317(15) |
| O(6A)-O(8B)  | 1.615(17) |
| O(7A)-O(7B)  | 0.897(12) |
| O(7A)-Cl(2B) | 1.461(12) |
| O(8A)-O(7B)  | 1.444(13) |
| O(8A)-Cl(2B) | 1.637(11) |
| O(9A)-O(9B)  | 0.681(19) |
| O(9A)-Cl(2B) | 1.329(16) |
| O(10)-Co(1)  | 2.121(2)  |
| O(10)-H(10)  | 0.79(4)   |
| O(10)-H(11)  | 0.81(5)   |
| Cl(1B)-O(1B) | 1.34(3)   |



|              |           |
|--------------|-----------|
| Cl(1B)-O(4B) | 1.375(13) |
| Cl(1B)-O(3B) | 1.495(9)  |
| Cl(1B)-O(2B) | 1.55(2)   |
| Cl(2B)-O(7B) | 1.249(13) |
| Cl(2B)-O(9B) | 1.431(17) |
| Cl(2B)-O(8B) | 1.434(15) |
| Cl(2B)-O(6B) | 1.553(15) |

|                  |          |
|------------------|----------|
| N(2)-C(1)-H(1A)  | 109.5    |
| N(2)-C(1)-H(1B)  | 109.5    |
| H(1A)-C(1)-H(1B) | 109.5    |
| N(2)-C(1)-H(1C)  | 109.5    |
| H(1A)-C(1)-H(1C) | 109.5    |
| H(1B)-C(1)-H(1C) | 109.5    |
| C(3)-C(2)-H(2A)  | 109.5    |
| C(3)-C(2)-H(2B)  | 109.5    |
| H(2A)-C(2)-H(2B) | 109.5    |
| C(3)-C(2)-H(2C)  | 109.5    |
| H(2A)-C(2)-H(2C) | 109.5    |
| H(2B)-C(2)-H(2C) | 109.5    |
| N(2)-C(3)-C(4)   | 107.0(3) |
| N(2)-C(3)-C(2)   | 123.0(3) |
| C(4)-C(3)-C(2)   | 130.0(3) |
| C(3)-C(4)-C(5)   | 105.3(3) |
| C(3)-C(4)-H(4)   | 127.3    |
| C(5)-C(4)-H(4)   | 127.3    |
| N(1)-C(5)-C(4)   | 111.0(3) |
| N(1)-C(5)-C(6)   | 117.5(3) |
| C(4)-C(5)-C(6)   | 131.5(3) |
| N(3)-C(6)-C(7)   | 110.8(3) |
| N(3)-C(6)-C(5)   | 117.4(3) |
| C(7)-C(6)-C(5)   | 131.8(3) |
| C(8)-C(7)-C(6)   | 105.9(3) |

|                     |          |
|---------------------|----------|
| C(8)-C(7)-H(7)      | 127.1    |
| C(6)-C(7)-H(7)      | 127.1    |
| N(4)-C(8)-C(7)      | 106.8(3) |
| N(4)-C(8)-C(9)      | 122.7(3) |
| C(7)-C(8)-C(9)      | 130.4(3) |
| C(8)-C(9)-H(9A)     | 109.5    |
| C(8)-C(9)-H(9B)     | 109.5    |
| H(9A)-C(9)-H(9B)    | 109.5    |
| C(8)-C(9)-H(9C)     | 109.5    |
| H(9A)-C(9)-H(9C)    | 109.5    |
| H(9B)-C(9)-H(9C)    | 109.5    |
| N(4)-C(10)-C(11)    | 114.6(3) |
| N(4)-C(10)-H(10A)   | 108.6    |
| C(11)-C(10)-H(10A)  | 108.6    |
| N(4)-C(10)-H(10B)   | 108.6    |
| C(11)-C(10)-H(10B)  | 108.6    |
| H(10A)-C(10)-H(10B) | 107.6    |
| N(5)-C(11)-C(10)    | 115.6(3) |
| N(5)-C(11)-H(11A)   | 108.4    |
| C(10)-C(11)-H(11A)  | 108.4    |
| N(5)-C(11)-H(11B)   | 108.4    |
| C(10)-C(11)-H(11B)  | 108.4    |
| H(11A)-C(11)-H(11B) | 107.4    |
| C(13)-C(12)-H(12A)  | 109.5    |
| C(13)-C(12)-H(12B)  | 109.5    |
| H(12A)-C(12)-H(12B) | 109.5    |
| C(13)-C(12)-H(12C)  | 109.5    |
| H(12A)-C(12)-H(12C) | 109.5    |
| H(12B)-C(12)-H(12C) | 109.5    |
| C(12)-C(13)-C(14)   | 110.8(3) |
| C(12)-C(13)-H(13A)  | 109.5    |
| C(14)-C(13)-H(13A)  | 109.5    |
| C(12)-C(13)-H(13B)  | 109.5    |

|                     |          |
|---------------------|----------|
| C(14)-C(13)-H(13B)  | 109.5    |
| H(13A)-C(13)-H(13B) | 108.1    |
| N(5)-C(14)-C(13)    | 116.7(3) |
| N(5)-C(14)-H(14A)   | 108.1    |
| C(13)-C(14)-H(14A)  | 108.1    |
| N(5)-C(14)-H(14B)   | 108.1    |
| C(13)-C(14)-H(14B)  | 108.1    |
| H(14A)-C(14)-H(14B) | 107.3    |
| N(5)-C(15)-C(16)    | 114.1(3) |
| N(5)-C(15)-H(15A)   | 108.7    |
| C(16)-C(15)-H(15A)  | 108.7    |
| N(5)-C(15)-H(15B)   | 108.7    |
| C(16)-C(15)-H(15B)  | 108.7    |
| H(15A)-C(15)-H(15B) | 107.6    |
| N(6)-C(16)-C(15)    | 112.1(3) |
| N(6)-C(16)-H(16A)   | 109.2    |
| C(15)-C(16)-H(16A)  | 109.2    |
| N(6)-C(16)-H(16B)   | 109.2    |
| C(15)-C(16)-H(16B)  | 109.2    |
| H(16A)-C(16)-H(16B) | 107.9    |
| N(6)-C(17)-C(19)    | 107.3(3) |
| N(6)-C(17)-C(18)    | 122.3(3) |
| C(19)-C(17)-C(18)   | 130.4(3) |
| C(17)-C(18)-H(18A)  | 109.5    |
| C(17)-C(18)-H(18B)  | 109.5    |
| H(18A)-C(18)-H(18B) | 109.5    |
| C(17)-C(18)-H(18C)  | 109.5    |
| H(18A)-C(18)-H(18C) | 109.5    |
| H(18B)-C(18)-H(18C) | 109.5    |
| C(17)-C(19)-C(20)   | 105.5(3) |
| C(17)-C(19)-H(19)   | 127.3    |
| C(20)-C(19)-H(19)   | 127.3    |
| N(7)-C(20)-C(19)    | 110.9(3) |

|                     |          |
|---------------------|----------|
| N(7)-C(20)-C(21)    | 117.0(3) |
| C(19)-C(20)-C(21)   | 132.0(3) |
| N(8)-C(21)-C(22)    | 110.8(3) |
| N(8)-C(21)-C(20)    | 116.6(3) |
| C(22)-C(21)-C(20)   | 132.6(3) |
| C(23)-C(22)-C(21)   | 105.4(3) |
| C(23)-C(22)-H(22)   | 127.3    |
| C(21)-C(22)-H(22)   | 127.3    |
| N(9)-C(23)-C(22)    | 107.4(3) |
| N(9)-C(23)-C(24)    | 121.5(3) |
| C(22)-C(23)-C(24)   | 131.1(3) |
| C(23)-C(24)-H(24A)  | 109.5    |
| C(23)-C(24)-H(24B)  | 109.5    |
| H(24A)-C(24)-H(24B) | 109.5    |
| C(23)-C(24)-H(24C)  | 109.5    |
| H(24A)-C(24)-H(24C) | 109.5    |
| H(24B)-C(24)-H(24C) | 109.5    |
| N(9)-C(25)-H(25A)   | 109.5    |
| N(9)-C(25)-H(25B)   | 109.5    |
| H(25A)-C(25)-H(25B) | 109.5    |
| N(9)-C(25)-H(25C)   | 109.5    |
| H(25A)-C(25)-H(25C) | 109.5    |
| H(25B)-C(25)-H(25C) | 109.5    |
| O(5)-C(26)-H(26A)   | 109.5    |
| O(5)-C(26)-H(26B)   | 109.5    |
| H(26A)-C(26)-H(26B) | 109.5    |
| O(5)-C(26)-H(26C)   | 109.5    |
| H(26A)-C(26)-H(26C) | 109.5    |
| H(26B)-C(26)-H(26C) | 109.5    |
| C(5)-N(1)-N(2)      | 105.2(2) |
| C(5)-N(1)-Co(1)     | 114.1(2) |
| N(2)-N(1)-Co(1)     | 140.5(2) |
| C(3)-N(2)-N(1)      | 111.4(3) |

|                    |            |
|--------------------|------------|
| C(3)-N(2)-C(1)     | 127.6(3)   |
| N(1)-N(2)-C(1)     | 121.0(2)   |
| C(6)-N(3)-N(4)     | 105.3(2)   |
| C(6)-N(3)-Co(1)    | 113.29(19) |
| N(4)-N(3)-Co(1)    | 140.91(19) |
| N(3)-N(4)-C(8)     | 111.1(2)   |
| N(3)-N(4)-C(10)    | 121.2(2)   |
| C(8)-N(4)-C(10)    | 127.6(3)   |
| C(15)-N(5)-C(14)   | 110.3(2)   |
| C(15)-N(5)-C(11)   | 112.2(3)   |
| C(14)-N(5)-C(11)   | 110.5(2)   |
| C(17)-N(6)-N(7)    | 110.8(2)   |
| C(17)-N(6)-C(16)   | 126.8(3)   |
| N(7)-N(6)-C(16)    | 121.9(2)   |
| C(20)-N(7)-N(6)    | 105.5(2)   |
| C(20)-N(7)-Co(1)   | 114.97(19) |
| N(6)-N(7)-Co(1)    | 139.52(19) |
| C(21)-N(8)-N(9)    | 105.0(2)   |
| C(21)-N(8)-Co(1)   | 113.85(19) |
| N(9)-N(8)-Co(1)    | 140.44(19) |
| C(23)-N(9)-N(8)    | 111.3(3)   |
| C(23)-N(9)-C(25)   | 128.5(3)   |
| N(8)-N(9)-C(25)    | 120.1(3)   |
| O(2A)-Cl(1A)-O(3A) | 116.8(12)  |
| O(2A)-Cl(1A)-O(1A) | 100.3(12)  |
| O(3A)-Cl(1A)-O(1A) | 121.9(8)   |
| O(2A)-Cl(1A)-O(4A) | 106.0(12)  |
| O(3A)-Cl(1A)-O(4A) | 102.3(7)   |
| O(1A)-Cl(1A)-O(4A) | 108.7(7)   |
| O(7B)-Cl(2A)-O(6A) | 124.4(10)  |
| O(7B)-Cl(2A)-O(8A) | 68.9(8)    |
| O(6A)-Cl(2A)-O(8A) | 121.0(9)   |
| O(7B)-Cl(2A)-O(6B) | 131.4(10)  |

|                     |            |
|---------------------|------------|
| O(6A)-Cl(2A)-O(6B)  | 25.5(8)    |
| O(8A)-Cl(2A)-O(6B)  | 98.4(7)    |
| O(7B)-Cl(2A)-O(9A)  | 103.6(9)   |
| O(6A)-Cl(2A)-O(9A)  | 120.6(10)  |
| O(8A)-Cl(2A)-O(9A)  | 106.8(7)   |
| O(6B)-Cl(2A)-O(9A)  | 124.8(9)   |
| O(7B)-Cl(2A)-O(9B)  | 125.7(9)   |
| O(6A)-Cl(2A)-O(9B)  | 107.2(9)   |
| O(8A)-Cl(2A)-O(9B)  | 99.9(8)    |
| O(6B)-Cl(2A)-O(9B)  | 102.4(7)   |
| O(9A)-Cl(2A)-O(9B)  | 26.3(7)    |
| O(7B)-Cl(2A)-O(7A)  | 35.4(6)    |
| O(6A)-Cl(2A)-O(7A)  | 103.1(8)   |
| O(8A)-Cl(2A)-O(7A)  | 104.2(6)   |
| O(6B)-Cl(2A)-O(7A)  | 123.7(8)   |
| O(9A)-Cl(2A)-O(7A)  | 96.7(8)    |
| O(9B)-Cl(2A)-O(7A)  | 122.8(8)   |
| O(7B)-Cl(2A)-O(8B)  | 103.7(9)   |
| O(6A)-Cl(2A)-O(8B)  | 63.3(8)    |
| O(8A)-Cl(2A)-O(8B)  | 172.5(7)   |
| O(6B)-Cl(2A)-O(8B)  | 87.0(7)    |
| O(9A)-Cl(2A)-O(8B)  | 73.9(7)    |
| O(9B)-Cl(2A)-O(8B)  | 83.9(8)    |
| O(7A)-Cl(2A)-O(8B)  | 68.4(6)    |
| C(26)-O(5)-Co(1)    | 122.02(19) |
| C(26)-O(5)-H(12)    | 107(3)     |
| Co(1)-O(5)-H(12)    | 106(3)     |
| O(6B)-O(6A)-Cl(2B)  | 100(2)     |
| O(6B)-O(6A)-Cl(2A)  | 89(2)      |
| Cl(2B)-O(6A)-Cl(2A) | 12.5(8)    |
| O(6B)-O(6A)-O(8B)   | 149(3)     |
| Cl(2B)-O(6A)-O(8B)  | 57.5(8)    |
| Cl(2A)-O(6A)-O(8B)  | 69.8(8)    |

|                     |            |
|---------------------|------------|
| O(7B)-O(7A)-Cl(2B)  | 58.3(9)    |
| O(7B)-O(7A)-Cl(2A)  | 48.9(10)   |
| Cl(2B)-O(7A)-Cl(2A) | 10.6(7)    |
| Cl(2A)-O(8A)-O(7B)  | 48.8(7)    |
| Cl(2A)-O(8A)-Cl(2B) | 4.1(7)     |
| O(7B)-O(8A)-Cl(2B)  | 47.3(5)    |
| O(9B)-O(9A)-Cl(2B)  | 84(2)      |
| O(9B)-O(9A)-Cl(2A)  | 80(2)      |
| Cl(2B)-O(9A)-Cl(2A) | 10.0(8)    |
| Co(1)-O(10)-H(10)   | 116(3)     |
| Co(1)-O(10)-H(11)   | 113(3)     |
| H(10)-O(10)-H(11)   | 108(4)     |
| O(5)-Co(1)-O(10)    | 86.51(9)   |
| O(5)-Co(1)-N(7)     | 85.55(9)   |
| O(10)-Co(1)-N(7)    | 170.05(9)  |
| O(5)-Co(1)-N(1)     | 170.37(9)  |
| O(10)-Co(1)-N(1)    | 93.89(9)   |
| N(7)-Co(1)-N(1)     | 94.95(9)   |
| O(5)-Co(1)-N(8)     | 93.70(9)   |
| O(10)-Co(1)-N(8)    | 97.59(9)   |
| N(7)-Co(1)-N(8)     | 76.97(9)   |
| N(1)-Co(1)-N(8)     | 95.78(10)  |
| O(5)-Co(1)-N(3)     | 92.91(9)   |
| O(10)-Co(1)-N(3)    | 86.58(10)  |
| N(7)-Co(1)-N(3)     | 99.79(9)   |
| N(1)-Co(1)-N(3)     | 77.53(10)  |
| N(8)-Co(1)-N(3)     | 172.39(10) |
| O(1B)-Cl(1B)-O(4B)  | 97.7(12)   |
| O(1B)-Cl(1B)-O(3B)  | 89.8(12)   |
| O(4B)-Cl(1B)-O(3B)  | 116.4(6)   |
| O(1B)-Cl(1B)-O(2B)  | 115.5(15)  |
| O(4B)-Cl(1B)-O(2B)  | 121.7(10)  |
| O(3B)-Cl(1B)-O(2B)  | 110.4(9)   |

|                     |           |
|---------------------|-----------|
| O(7B)-Cl(2B)-O(6A)  | 118.0(12) |
| O(7B)-Cl(2B)-O(9A)  | 108.1(11) |
| O(6A)-Cl(2B)-O(9A)  | 133.8(12) |
| O(7B)-Cl(2B)-O(9B)  | 125.9(12) |
| O(6A)-Cl(2B)-O(9B)  | 112.4(10) |
| O(9A)-Cl(2B)-O(9B)  | 28.3(8)   |
| O(7B)-Cl(2B)-O(8B)  | 115.7(10) |
| O(6A)-Cl(2B)-O(8B)  | 71.8(9)   |
| O(9A)-Cl(2B)-O(8B)  | 87.8(9)   |
| O(9B)-Cl(2B)-O(8B)  | 97.2(9)   |
| O(7B)-Cl(2B)-O(7A)  | 37.6(7)   |
| O(6A)-Cl(2B)-O(7A)  | 107.7(10) |
| O(9A)-Cl(2B)-O(7A)  | 107.8(10) |
| O(9B)-Cl(2B)-O(7A)  | 135.8(9)  |
| O(8B)-Cl(2B)-O(7A)  | 78.1(7)   |
| O(7B)-Cl(2B)-O(6B)  | 116.8(10) |
| O(6A)-Cl(2B)-O(6B)  | 23.5(8)   |
| O(9A)-Cl(2B)-O(6B)  | 128.9(11) |
| O(9B)-Cl(2B)-O(6B)  | 101.6(9)  |
| O(8B)-Cl(2B)-O(6B)  | 93.5(9)   |
| O(7A)-Cl(2B)-O(6B)  | 122.4(9)  |
| O(7B)-Cl(2B)-O(8A)  | 58.2(7)   |
| O(6A)-Cl(2B)-O(8A)  | 104.4(9)  |
| O(9A)-Cl(2B)-O(8A)  | 100.5(8)  |
| O(9B)-Cl(2B)-O(8A)  | 91.9(8)   |
| O(8B)-Cl(2B)-O(8A)  | 170.9(9)  |
| O(7A)-Cl(2B)-O(8A)  | 95.6(7)   |
| O(6B)-Cl(2B)-O(8A)  | 84.3(7)   |
| Cl(2B)-O(8B)-O(6A)  | 50.7(7)   |
| Cl(2B)-O(8B)-Cl(2A) | 4.2(7)    |
| O(6A)-O(8B)-Cl(2A)  | 46.9(6)   |
| O(7A)-O(7B)-Cl(2A)  | 95.7(13)  |
| O(7A)-O(7B)-Cl(2B)  | 84.1(13)  |



|                     |           |
|---------------------|-----------|
| Cl(2A)-O(7B)-Cl(2B) | 13.0(9)   |
| O(7A)-O(7B)-O(8A)   | 157.4(15) |
| Cl(2A)-O(7B)-O(8A)  | 62.3(8)   |
| Cl(2B)-O(7B)-O(8A)  | 74.5(8)   |
| O(9A)-O(9B)-Cl(2B)  | 68(2)     |
| O(9A)-O(9B)-Cl(2A)  | 74(2)     |
| Cl(2B)-O(9B)-Cl(2A) | 10.7(7)   |
| O(6A)-O(6B)-Cl(2A)  | 65.0(19)  |
| O(6A)-O(6B)-Cl(2B)  | 56.6(19)  |
| Cl(2A)-O(6B)-Cl(2B) | 10.3(7)   |

---

**Table S5.** Bond lengths [Å] and angles [°] for **4**.

---

|            |          |
|------------|----------|
| C(1)-N(9)  | 1.455(3) |
| C(1)-H(1A) | 0.9800   |
| C(1)-H(1B) | 0.9800   |
| C(1)-H(1C) | 0.9800   |
| C(2)-C(3)  | 1.486(4) |
| C(2)-H(2A) | 0.9800   |
| C(2)-H(2B) | 0.9800   |
| C(2)-H(2C) | 0.9800   |
| C(3)-N(9)  | 1.359(3) |
| C(3)-C(4)  | 1.383(4) |
| C(4)-C(5)  | 1.395(4) |
| C(4)-H(4)  | 0.9500   |
| C(5)-N(8)  | 1.342(3) |
| C(5)-C(6)  | 1.463(4) |
| C(6)-N(7)  | 1.340(3) |
| C(6)-C(7)  | 1.397(3) |
| C(7)-C(8)  | 1.379(3) |
| C(7)-H(7)  | 0.9500   |

|              |          |
|--------------|----------|
| C(8)-N(6)    | 1.362(3) |
| C(8)-C(9)    | 1.493(4) |
| C(9)-H(9A)   | 0.9800   |
| C(9)-H(9B)   | 0.9800   |
| C(9)-H(9C)   | 0.9800   |
| C(10)-N(6)   | 1.455(3) |
| C(10)-C(11)  | 1.527(4) |
| C(10)-H(10A) | 0.9900   |
| C(10)-H(10B) | 0.9900   |
| C(11)-N(5)   | 1.458(3) |
| C(11)-H(11A) | 0.9900   |
| C(11)-H(11B) | 0.9900   |
| C(12)-N(5)   | 1.474(4) |
| C(12)-C(13)  | 1.539(5) |
| C(12)-H(12A) | 0.9900   |
| C(12)-H(12B) | 0.9900   |
| C(13)-C(14)  | 1.545(7) |
| C(13)-H(13A) | 0.9900   |
| C(13)-H(13B) | 0.9900   |
| C(14)-H(14A) | 0.9800   |
| C(14)-H(14B) | 0.9800   |
| C(14)-H(14C) | 0.9800   |
| C(15)-N(5)   | 1.459(4) |
| C(15)-C(16)  | 1.541(4) |
| C(15)-H(15A) | 0.9900   |
| C(15)-H(15B) | 0.9900   |
| C(16)-N(4)   | 1.459(3) |
| C(16)-H(16A) | 0.9900   |
| C(16)-H(16B) | 0.9900   |
| C(17)-C(18)  | 1.492(4) |
| C(17)-H(17A) | 0.9800   |
| C(17)-H(17B) | 0.9800   |
| C(17)-H(17C) | 0.9800   |

|              |          |
|--------------|----------|
| C(18)-N(4)   | 1.363(3) |
| C(18)-C(19)  | 1.368(4) |
| C(19)-C(20)  | 1.401(4) |
| C(19)-H(19)  | 0.9500   |
| C(20)-N(3)   | 1.343(3) |
| C(20)-C(21)  | 1.448(4) |
| C(21)-N(1)   | 1.342(3) |
| C(21)-C(22)  | 1.400(4) |
| C(22)-C(23)  | 1.381(4) |
| C(22)-H(22)  | 0.9500   |
| C(23)-N(2)   | 1.356(4) |
| C(23)-C(24)  | 1.506(4) |
| C(24)-H(24A) | 0.9800   |
| C(24)-H(24B) | 0.9800   |
| C(24)-H(24C) | 0.9800   |
| C(25)-N(2)   | 1.449(4) |
| C(25)-H(25A) | 0.9800   |
| C(25)-H(25B) | 0.9800   |
| C(25)-H(25C) | 0.9800   |
| C(26)-N(10)  | 1.170(4) |
| C(26)-S(2)   | 1.630(3) |
| C(27)-N(11)  | 1.160(3) |
| C(27)-S(1)   | 1.630(3) |
| N(1)-N(2)    | 1.362(3) |
| N(1)-Fe(1)   | 2.226(2) |
| N(3)-N(4)    | 1.367(3) |
| N(3)-Fe(1)   | 2.304(2) |
| N(6)-N(7)    | 1.365(3) |
| N(7)-Fe(1)   | 2.235(2) |
| N(8)-N(9)    | 1.363(3) |
| N(8)-Fe(1)   | 2.274(2) |
| N(10)-Fe(1)  | 2.085(3) |
| N(11)-Fe(1)  | 2.099(3) |

|                  |          |
|------------------|----------|
| N(9)-C(1)-H(1A)  | 109.5    |
| N(9)-C(1)-H(1B)  | 109.5    |
| H(1A)-C(1)-H(1B) | 109.5    |
| N(9)-C(1)-H(1C)  | 109.5    |
| H(1A)-C(1)-H(1C) | 109.5    |
| H(1B)-C(1)-H(1C) | 109.5    |
| C(3)-C(2)-H(2A)  | 109.5    |
| C(3)-C(2)-H(2B)  | 109.5    |
| H(2A)-C(2)-H(2B) | 109.5    |
| C(3)-C(2)-H(2C)  | 109.5    |
| H(2A)-C(2)-H(2C) | 109.5    |
| H(2B)-C(2)-H(2C) | 109.5    |
| N(9)-C(3)-C(4)   | 106.3(2) |
| N(9)-C(3)-C(2)   | 122.7(3) |
| C(4)-C(3)-C(2)   | 131.0(3) |
| C(3)-C(4)-C(5)   | 105.7(2) |
| C(3)-C(4)-H(4)   | 127.1    |
| C(5)-C(4)-H(4)   | 127.1    |
| N(8)-C(5)-C(4)   | 111.2(2) |
| N(8)-C(5)-C(6)   | 117.8(2) |
| C(4)-C(5)-C(6)   | 131.1(2) |
| N(7)-C(6)-C(7)   | 111.2(2) |
| N(7)-C(6)-C(5)   | 117.6(2) |
| C(7)-C(6)-C(5)   | 131.2(2) |
| C(8)-C(7)-C(6)   | 105.6(2) |
| C(8)-C(7)-H(7)   | 127.2    |
| C(6)-C(7)-H(7)   | 127.2    |
| N(6)-C(8)-C(7)   | 106.6(2) |
| N(6)-C(8)-C(9)   | 123.2(2) |
| C(7)-C(8)-C(9)   | 130.1(2) |
| C(8)-C(9)-H(9A)  | 109.5    |
| C(8)-C(9)-H(9B)  | 109.5    |

|                     |          |
|---------------------|----------|
| H(9A)-C(9)-H(9B)    | 109.5    |
| C(8)-C(9)-H(9C)     | 109.5    |
| H(9A)-C(9)-H(9C)    | 109.5    |
| H(9B)-C(9)-H(9C)    | 109.5    |
| N(6)-C(10)-C(11)    | 111.9(2) |
| N(6)-C(10)-H(10A)   | 109.2    |
| C(11)-C(10)-H(10A)  | 109.2    |
| N(6)-C(10)-H(10B)   | 109.2    |
| C(11)-C(10)-H(10B)  | 109.2    |
| H(10A)-C(10)-H(10B) | 107.9    |
| N(5)-C(11)-C(10)    | 109.9(2) |
| N(5)-C(11)-H(11A)   | 109.7    |
| C(10)-C(11)-H(11A)  | 109.7    |
| N(5)-C(11)-H(11B)   | 109.7    |
| C(10)-C(11)-H(11B)  | 109.7    |
| H(11A)-C(11)-H(11B) | 108.2    |
| N(5)-C(12)-C(13)    | 113.4(3) |
| N(5)-C(12)-H(12A)   | 108.9    |
| C(13)-C(12)-H(12A)  | 108.9    |
| N(5)-C(12)-H(12B)   | 108.9    |
| C(13)-C(12)-H(12B)  | 108.9    |
| H(12A)-C(12)-H(12B) | 107.7    |
| C(12)-C(13)-C(14)   | 111.9(3) |
| C(12)-C(13)-H(13A)  | 109.2    |
| C(14)-C(13)-H(13A)  | 109.2    |
| C(12)-C(13)-H(13B)  | 109.2    |
| C(14)-C(13)-H(13B)  | 109.2    |
| H(13A)-C(13)-H(13B) | 107.9    |
| C(13)-C(14)-H(14A)  | 109.5    |
| C(13)-C(14)-H(14B)  | 109.5    |
| H(14A)-C(14)-H(14B) | 109.5    |
| C(13)-C(14)-H(14C)  | 109.5    |
| H(14A)-C(14)-H(14C) | 109.5    |

|                     |          |
|---------------------|----------|
| H(14B)-C(14)-H(14C) | 109.5    |
| N(5)-C(15)-C(16)    | 113.1(2) |
| N(5)-C(15)-H(15A)   | 109.0    |
| C(16)-C(15)-H(15A)  | 109.0    |
| N(5)-C(15)-H(15B)   | 109.0    |
| C(16)-C(15)-H(15B)  | 109.0    |
| H(15A)-C(15)-H(15B) | 107.8    |
| N(4)-C(16)-C(15)    | 113.1(2) |
| N(4)-C(16)-H(16A)   | 109.0    |
| C(15)-C(16)-H(16A)  | 109.0    |
| N(4)-C(16)-H(16B)   | 109.0    |
| C(15)-C(16)-H(16B)  | 109.0    |
| H(16A)-C(16)-H(16B) | 107.8    |
| C(18)-C(17)-H(17A)  | 109.5    |
| C(18)-C(17)-H(17B)  | 109.5    |
| H(17A)-C(17)-H(17B) | 109.5    |
| C(18)-C(17)-H(17C)  | 109.5    |
| H(17A)-C(17)-H(17C) | 109.5    |
| H(17B)-C(17)-H(17C) | 109.5    |
| N(4)-C(18)-C(19)    | 107.1(2) |
| N(4)-C(18)-C(17)    | 122.8(3) |
| C(19)-C(18)-C(17)   | 130.1(3) |
| C(18)-C(19)-C(20)   | 105.8(3) |
| C(18)-C(19)-H(19)   | 127.1    |
| C(20)-C(19)-H(19)   | 127.1    |
| N(3)-C(20)-C(19)    | 111.0(2) |
| N(3)-C(20)-C(21)    | 119.1(2) |
| C(19)-C(20)-C(21)   | 130.0(3) |
| N(1)-C(21)-C(22)    | 110.8(2) |
| N(1)-C(21)-C(20)    | 118.4(2) |
| C(22)-C(21)-C(20)   | 130.9(3) |
| C(23)-C(22)-C(21)   | 105.5(3) |
| C(23)-C(22)-H(22)   | 127.2    |

|                     |            |
|---------------------|------------|
| C(21)-C(22)-H(22)   | 127.2      |
| N(2)-C(23)-C(22)    | 106.9(2)   |
| N(2)-C(23)-C(24)    | 122.3(3)   |
| C(22)-C(23)-C(24)   | 130.9(3)   |
| C(23)-C(24)-H(24A)  | 109.5      |
| C(23)-C(24)-H(24B)  | 109.5      |
| H(24A)-C(24)-H(24B) | 109.5      |
| C(23)-C(24)-H(24C)  | 109.5      |
| H(24A)-C(24)-H(24C) | 109.5      |
| H(24B)-C(24)-H(24C) | 109.5      |
| N(2)-C(25)-H(25A)   | 109.5      |
| N(2)-C(25)-H(25B)   | 109.5      |
| H(25A)-C(25)-H(25B) | 109.5      |
| N(2)-C(25)-H(25C)   | 109.5      |
| H(25A)-C(25)-H(25C) | 109.5      |
| H(25B)-C(25)-H(25C) | 109.5      |
| N(10)-C(26)-S(2)    | 179.2(3)   |
| N(11)-C(27)-S(1)    | 179.8(3)   |
| C(21)-N(1)-N(2)     | 105.3(2)   |
| C(21)-N(1)-Fe(1)    | 115.00(18) |
| N(2)-N(1)-Fe(1)     | 138.72(18) |
| C(23)-N(2)-N(1)     | 111.5(2)   |
| C(23)-N(2)-C(25)    | 128.2(2)   |
| N(1)-N(2)-C(25)     | 120.3(2)   |
| C(20)-N(3)-N(4)     | 104.9(2)   |
| C(20)-N(3)-Fe(1)    | 112.10(17) |
| N(4)-N(3)-Fe(1)     | 142.24(17) |
| C(18)-N(4)-N(3)     | 111.3(2)   |
| C(18)-N(4)-C(16)    | 128.1(2)   |
| N(3)-N(4)-C(16)     | 120.2(2)   |
| C(11)-N(5)-C(15)    | 113.0(2)   |
| C(11)-N(5)-C(12)    | 113.0(2)   |
| C(15)-N(5)-C(12)    | 112.3(2)   |

|                   |            |
|-------------------|------------|
| C(8)-N(6)-N(7)    | 111.5(2)   |
| C(8)-N(6)-C(10)   | 129.3(2)   |
| N(7)-N(6)-C(10)   | 119.17(19) |
| C(6)-N(7)-N(6)    | 105.02(19) |
| C(6)-N(7)-Fe(1)   | 116.06(16) |
| N(6)-N(7)-Fe(1)   | 138.91(16) |
| C(5)-N(8)-N(9)    | 104.8(2)   |
| C(5)-N(8)-Fe(1)   | 114.52(16) |
| N(9)-N(8)-Fe(1)   | 140.38(16) |
| C(3)-N(9)-N(8)    | 111.9(2)   |
| C(3)-N(9)-C(1)    | 127.2(2)   |
| N(8)-N(9)-C(1)    | 120.9(2)   |
| C(26)-N(10)-Fe(1) | 169.3(3)   |
| C(27)-N(11)-Fe(1) | 168.1(2)   |
| N(10)-Fe(1)-N(11) | 96.71(10)  |
| N(10)-Fe(1)-N(1)  | 88.41(10)  |
| N(11)-Fe(1)-N(1)  | 168.85(9)  |
| N(10)-Fe(1)-N(7)  | 168.02(9)  |
| N(11)-Fe(1)-N(7)  | 89.46(9)   |
| N(1)-Fe(1)-N(7)   | 87.36(8)   |
| N(10)-Fe(1)-N(8)  | 95.58(9)   |
| N(11)-Fe(1)-N(8)  | 92.04(9)   |
| N(1)-Fe(1)-N(8)   | 97.33(8)   |
| N(7)-Fe(1)-N(8)   | 73.88(8)   |
| N(10)-Fe(1)-N(3)  | 90.67(9)   |
| N(11)-Fe(1)-N(3)  | 95.60(9)   |
| N(1)-Fe(1)-N(3)   | 74.37(8)   |
| N(7)-Fe(1)-N(3)   | 98.97(8)   |
| N(8)-Fe(1)-N(3)   | 169.51(8)  |

---



**Fig. S1** FT-IR spectroscopy comparison plot of **L** with **1 - 4**.

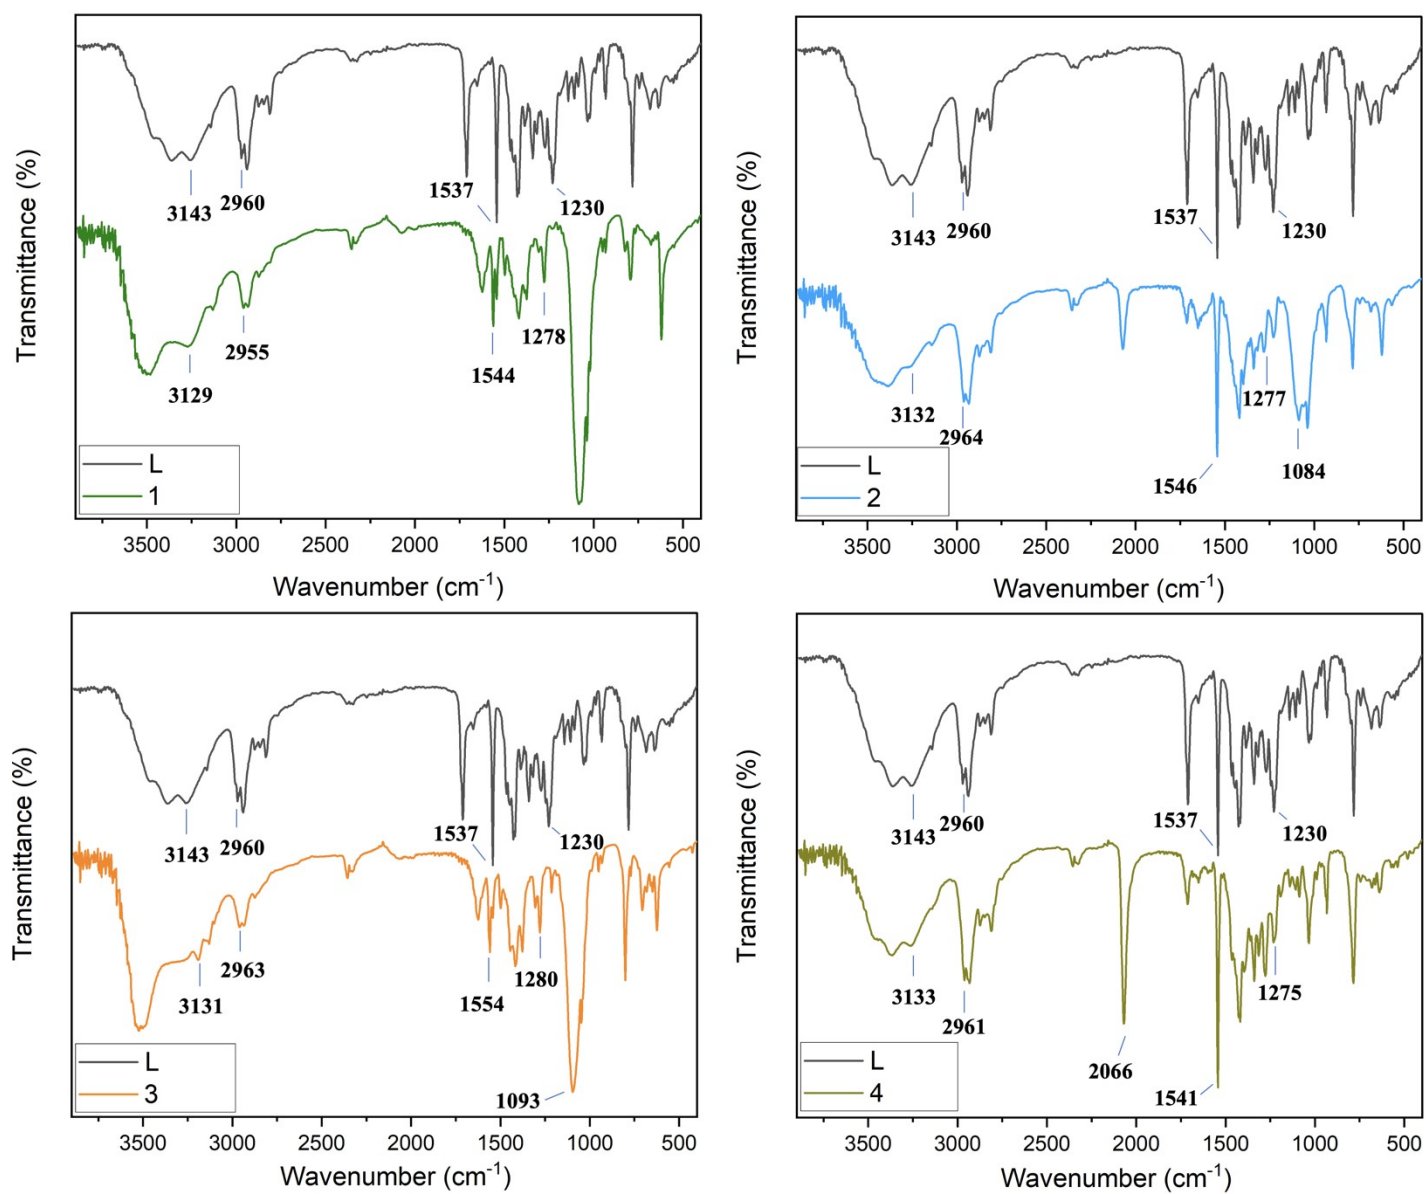

**Fig. S2** Diffuse reflectance spectroscopy comparison plot of **L** with **1 - 4**.

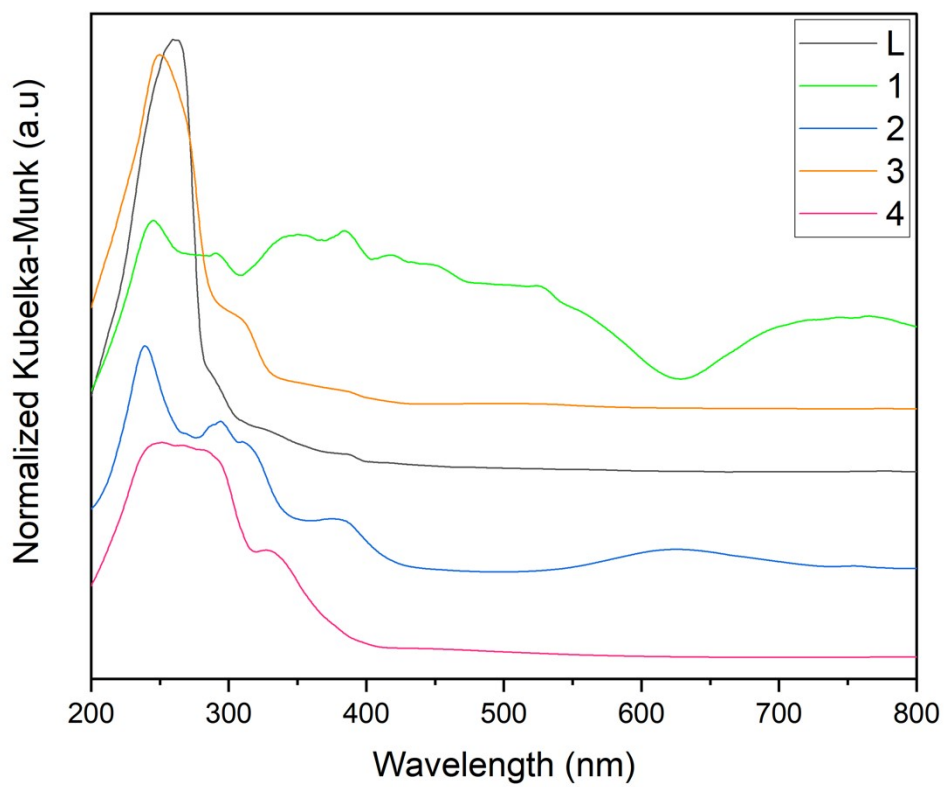

### 1. <sup>1</sup>H-NMR:

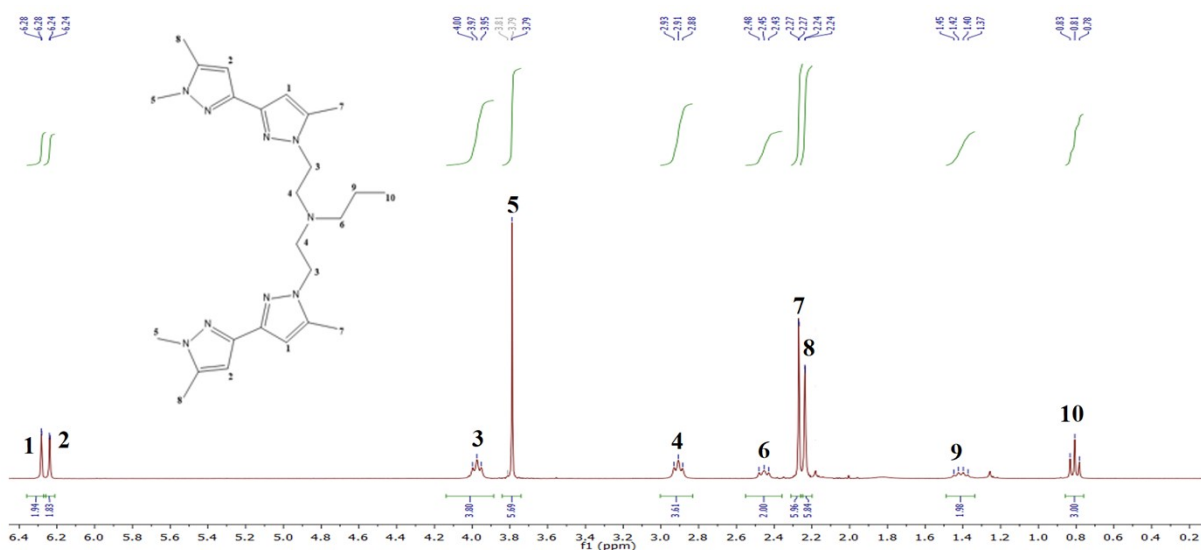

### 3. <sup>13</sup>C-NMR:

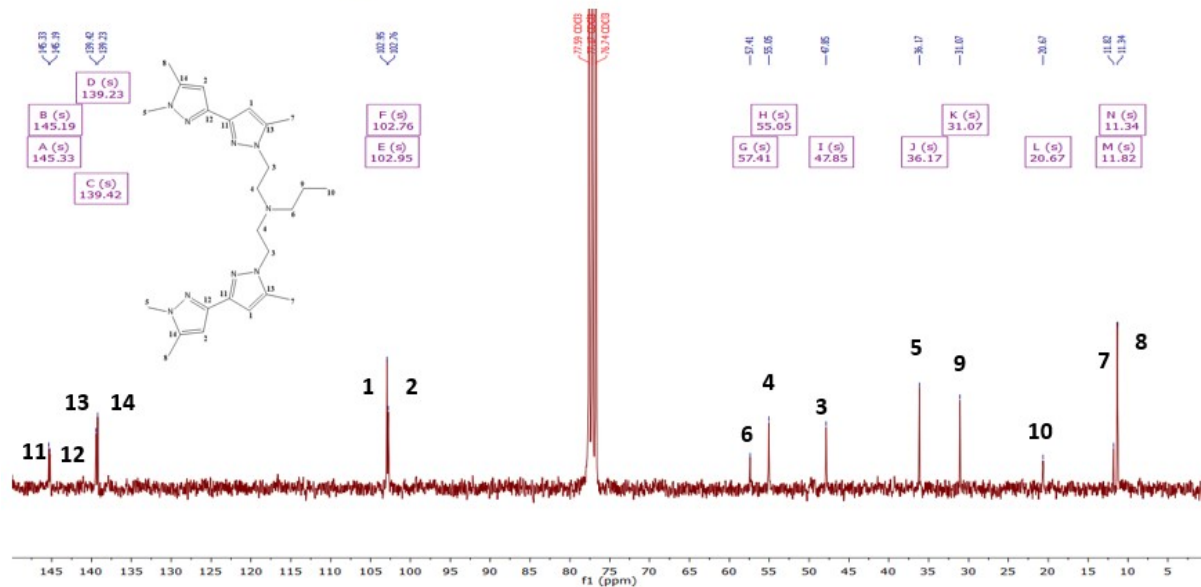

#### 4. HRMS of L:

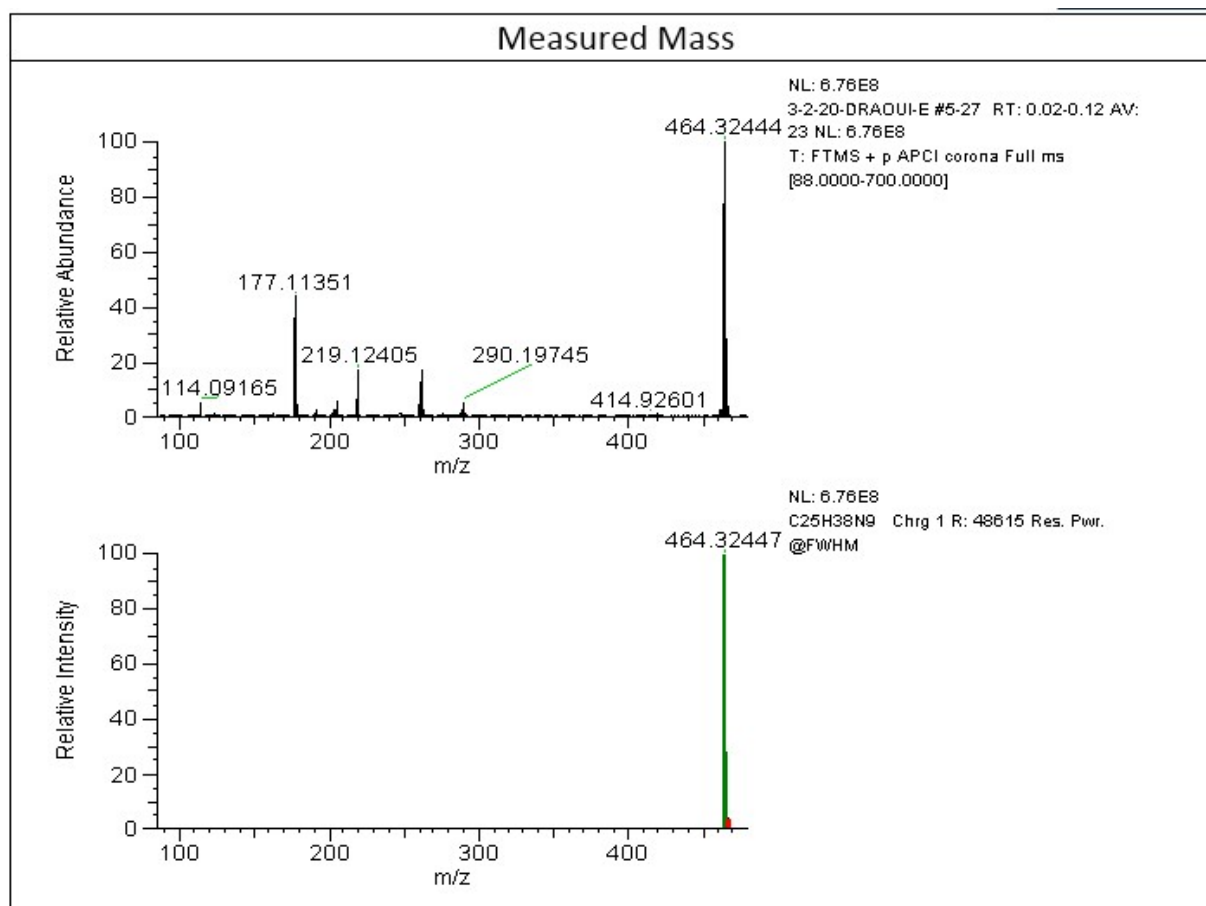

#### 5. Elemental composition of L:

| Peak Mass | Display Formula                                | MS Cov. [%] | Delta [ppm] | Theo. mass |
|-----------|------------------------------------------------|-------------|-------------|------------|
| 464.32444 | C <sub>25</sub> H <sub>38</sub> N <sub>9</sub> | 99.98       | -0.005      | 464.32447  |

3-2-20-DRAOUI-E #4-27 RT: 0.02-0.12 AV: 24 NL: 7.37E8  
T: FTMS + p APCI corona Full lock ms [88.0000-700.0000]

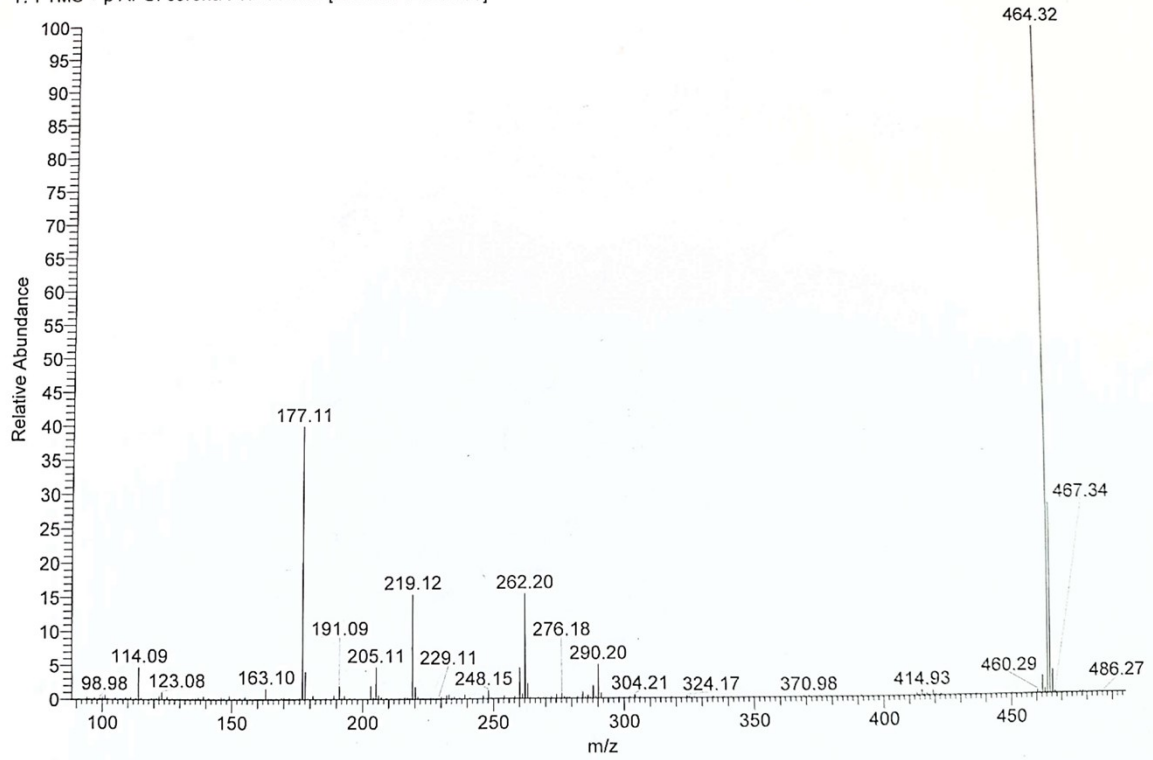

## 6. HRMS of $Cu_2LCl_4$ :

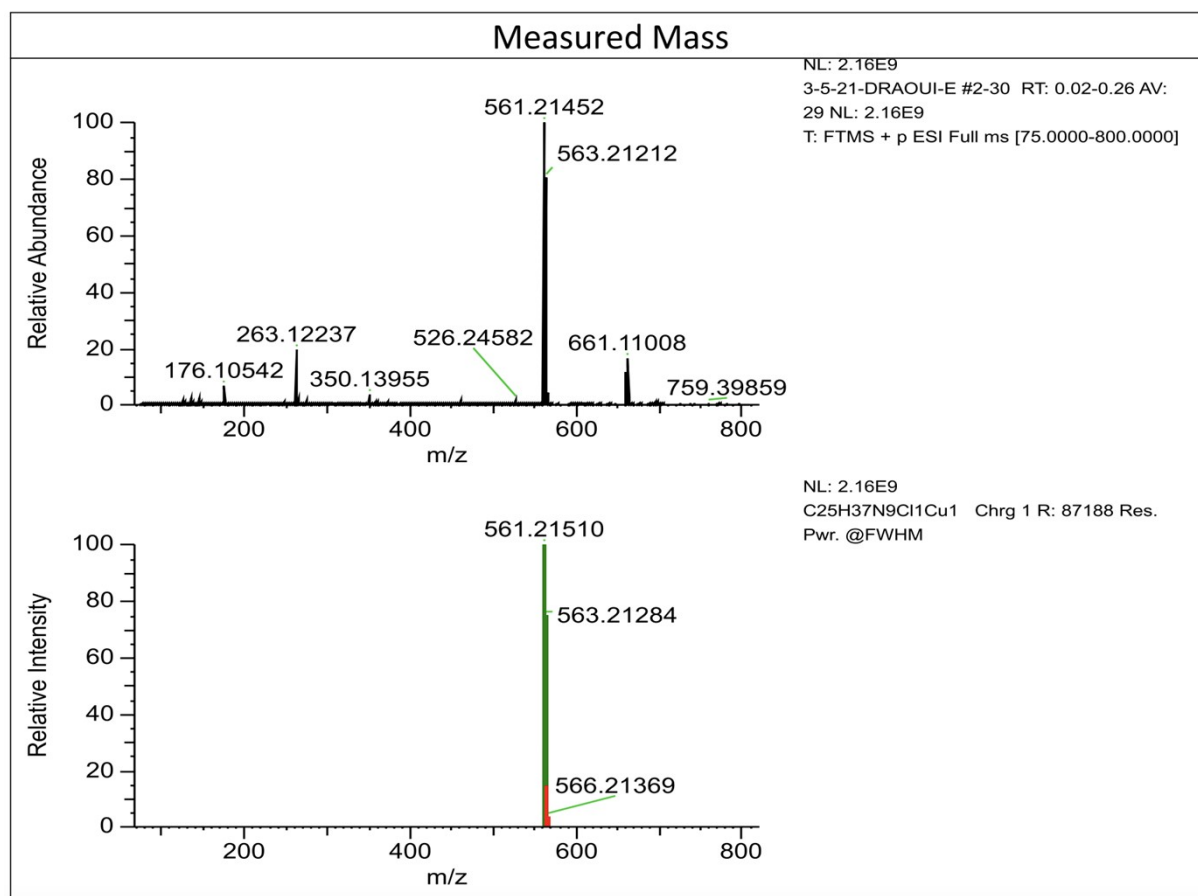

## 7. Elemental composition of $Cu_2LCl_4$ :

| Peak Mass | Display Formula                     | MS Cov.[%] | Delta[ppm] | Theo.mass |
|-----------|-------------------------------------|------------|------------|-----------|
| 561.21452 | $C_{25}H_{37}N_9^{35}Cl^{63}Cu$     | 99.95      | -1.03      | 561.21510 |
| 659.11254 | $C_{25}H_{37}N_9^{35}Cl_2^{63}Cu_2$ | 99.89      | -1.53      | 659.11355 |
| 263.12237 | $C_{25}H_{37}N_9^{63}Cu$            | 97.32      | -1.80      | 263.12285 |

D:\DATA\3-5-21-DRAOUI-E  
C25H37N9Cu2Cl4 LCu DRAOUI GARCIA  
3-5-21-DRAOUI-E #1-30 RT: 0.01-0.26 AV: 30 NL: 2.15E9  
T: FTMS + p ESI Full ms [75.0000-800.0000]

05/03/21 16:06:01

C25H37N9Cu2Cl4 LCu

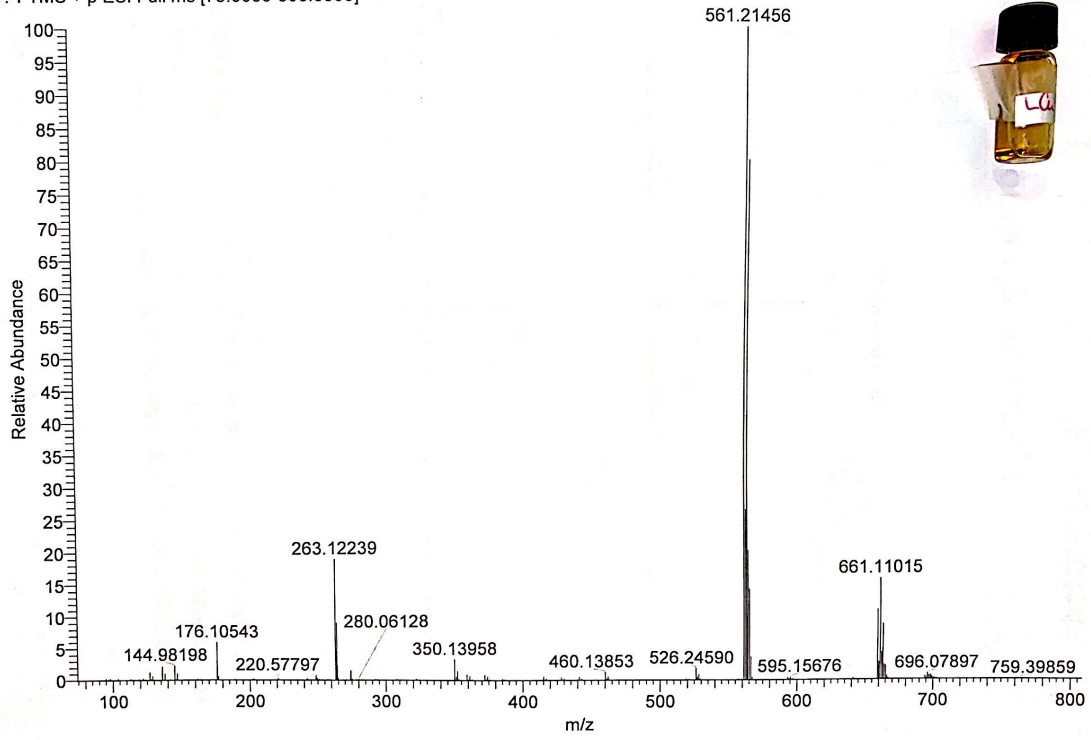

8. HRMS of NiL(CH<sub>3</sub>OH)(H<sub>2</sub>O):

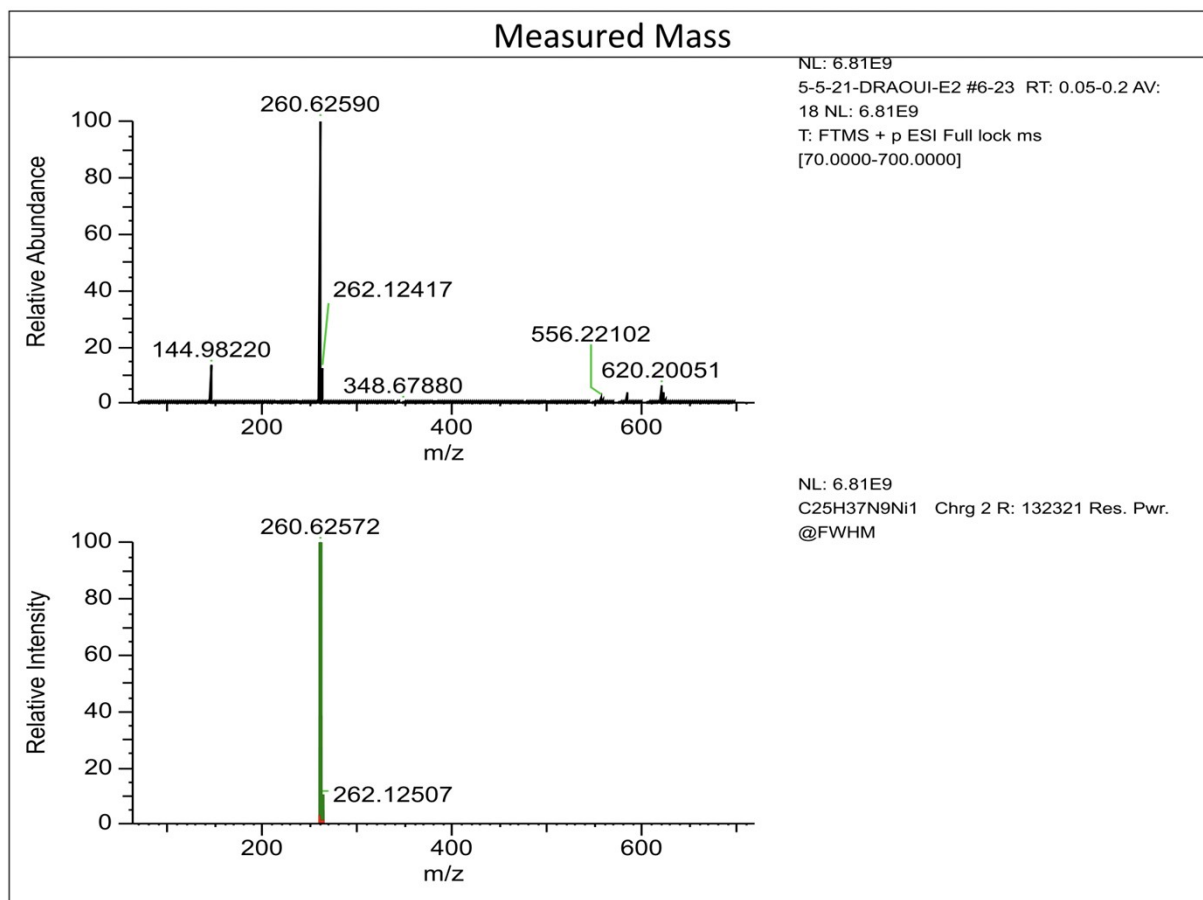

9. Elemental composition of NiL(CH<sub>3</sub>OH)(H<sub>2</sub>O):

| Peak Mass | Display Formula                                                 | MS Cov. [%] | Delta [ppm] | Theo. mass |
|-----------|-----------------------------------------------------------------|-------------|-------------|------------|
| 260.62590 | C <sub>25</sub> H <sub>37</sub> N <sub>9</sub> <sup>58</sup> Ni | 97.97       | 0.69        | 260.62572  |



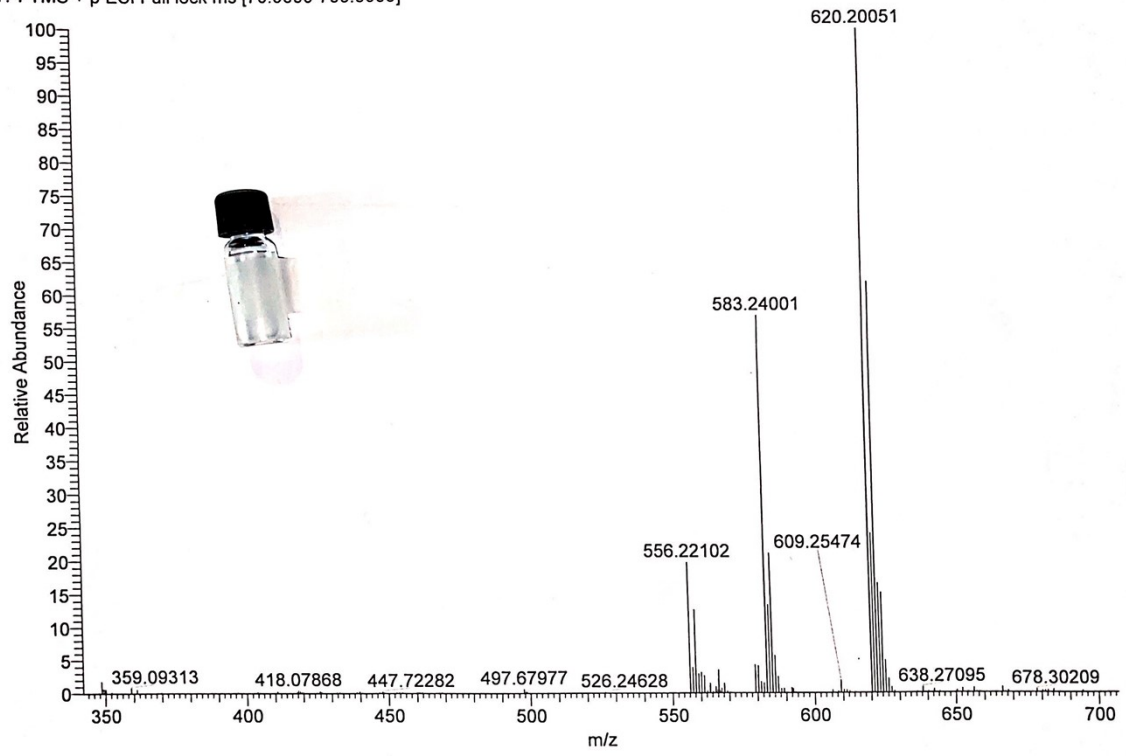

5-5-21-DRAOUI-E2  
C26H43N9NiO2 LNI DRAOUI GARCIA  
05/05/21 11:59:24 C26H43N9NiO2  
5-5-21-DRAOUI-E2 #2-30 RT: 0.02-0.26 AV: 29 NL: 6.94E9  
T: FTMS + p ESI Full lock ms [70.0000-700.0000]  
260.62590

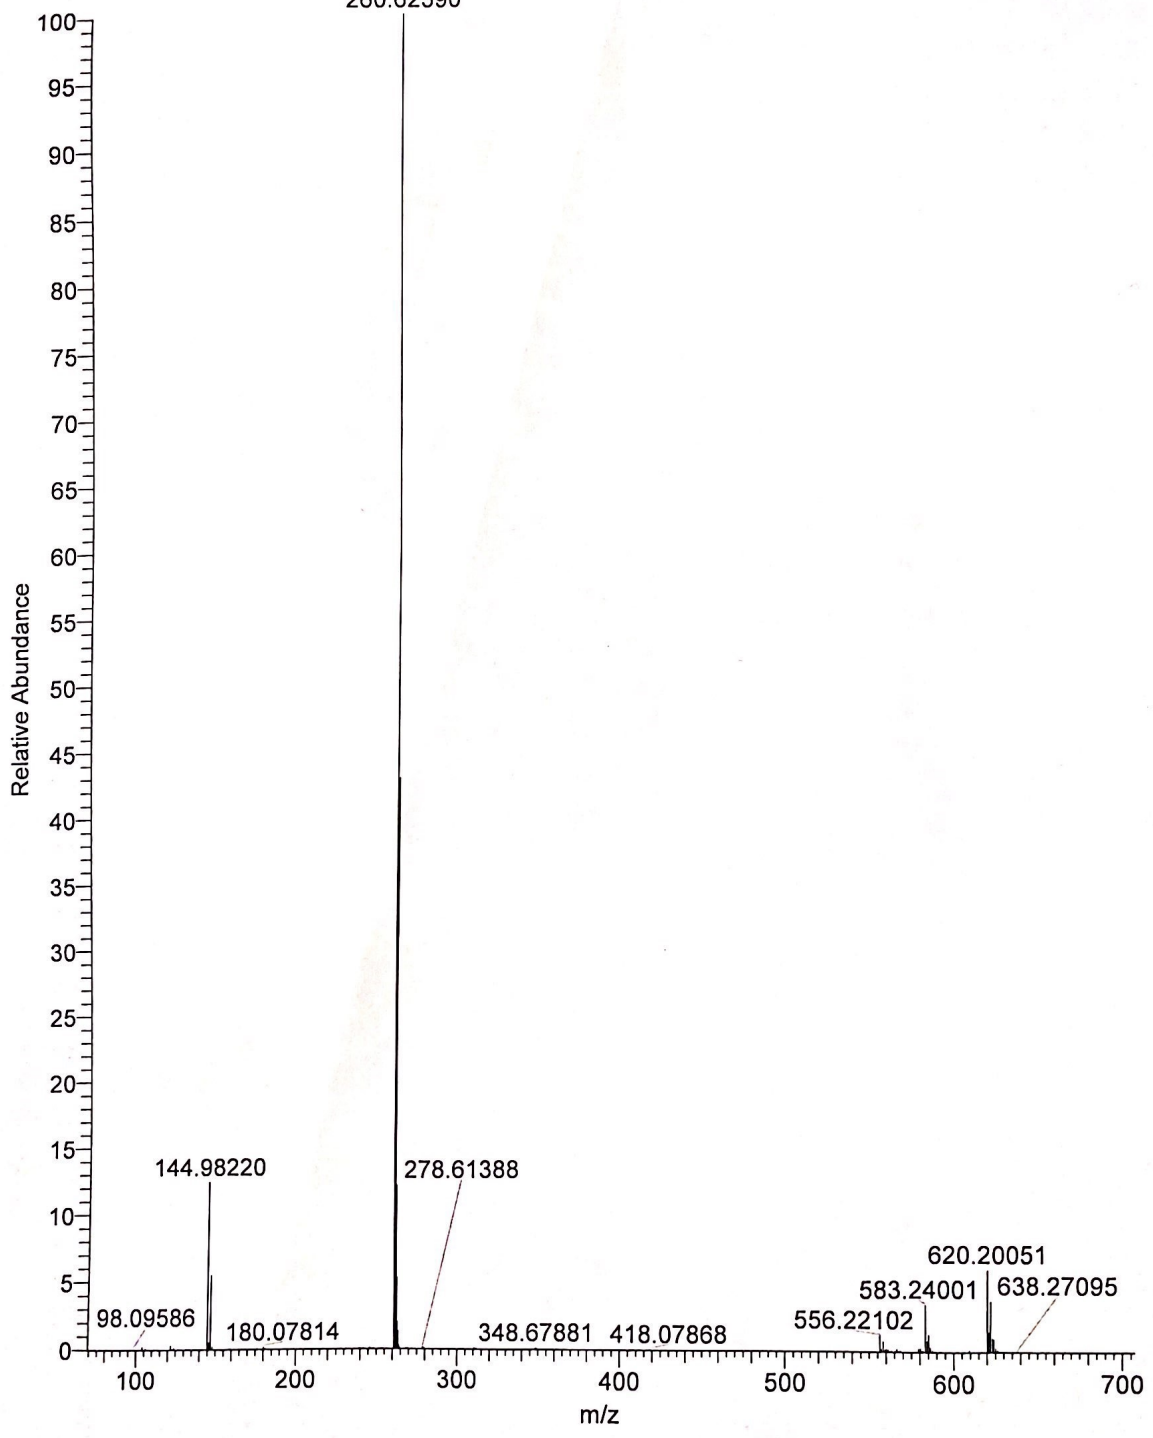

10. HRMS of [FeL(NCS)<sub>2</sub>]:

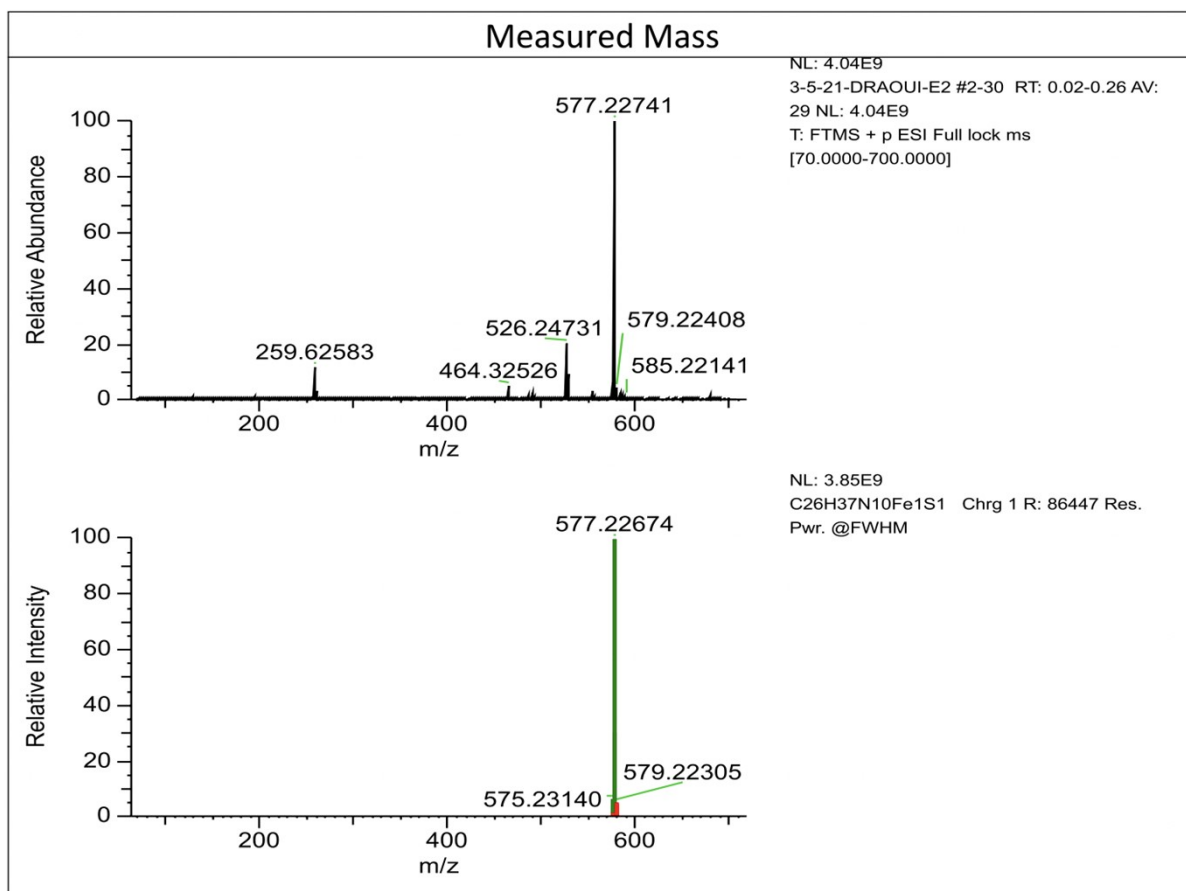

11. Elemental composition of [FeL(NCS)<sub>2</sub>]:

| Peak Mass | Display Formula                                                                  | MS Cov.[%] | Delta[ppm] | Theo.mass |
|-----------|----------------------------------------------------------------------------------|------------|------------|-----------|
| 575.23264 | C <sub>26</sub> H <sub>37</sub> N <sub>10</sub> <sup>54</sup> Fe <sup>32</sup> S | 100,17     | 2,15       | 575.23140 |

D:\DATA\3-5-21-DRAOUI-E2  
C27H37N11FeS2 LFe DRAOUI GARCIA  
3-5-21-DRAOUI-E2 #1-30 RT: 0.01-0.26 AV: 30 NL: 4.03E9  
T: FTMS + p ESI Full lock ms [70.0000-700.0000]

05/03/21 16:22:28

C27H37N11FeS2 LFe

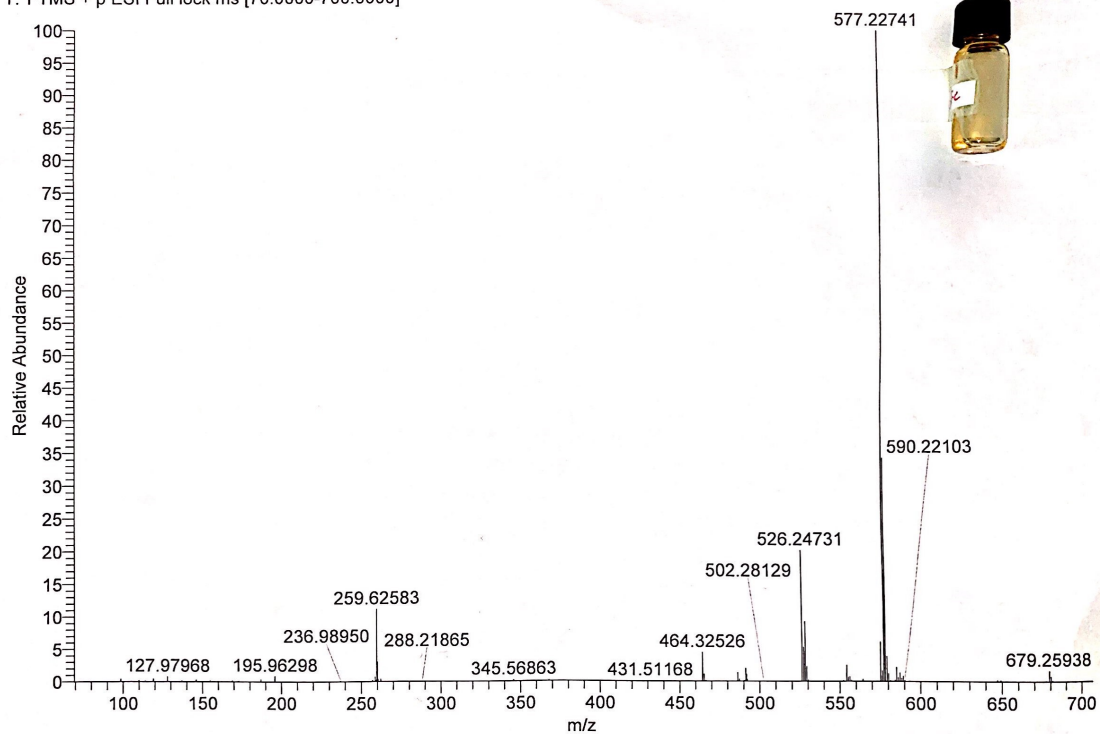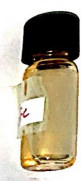

12. HRMS of  $CoL(CH_3OH)(H_2O)_2$ :

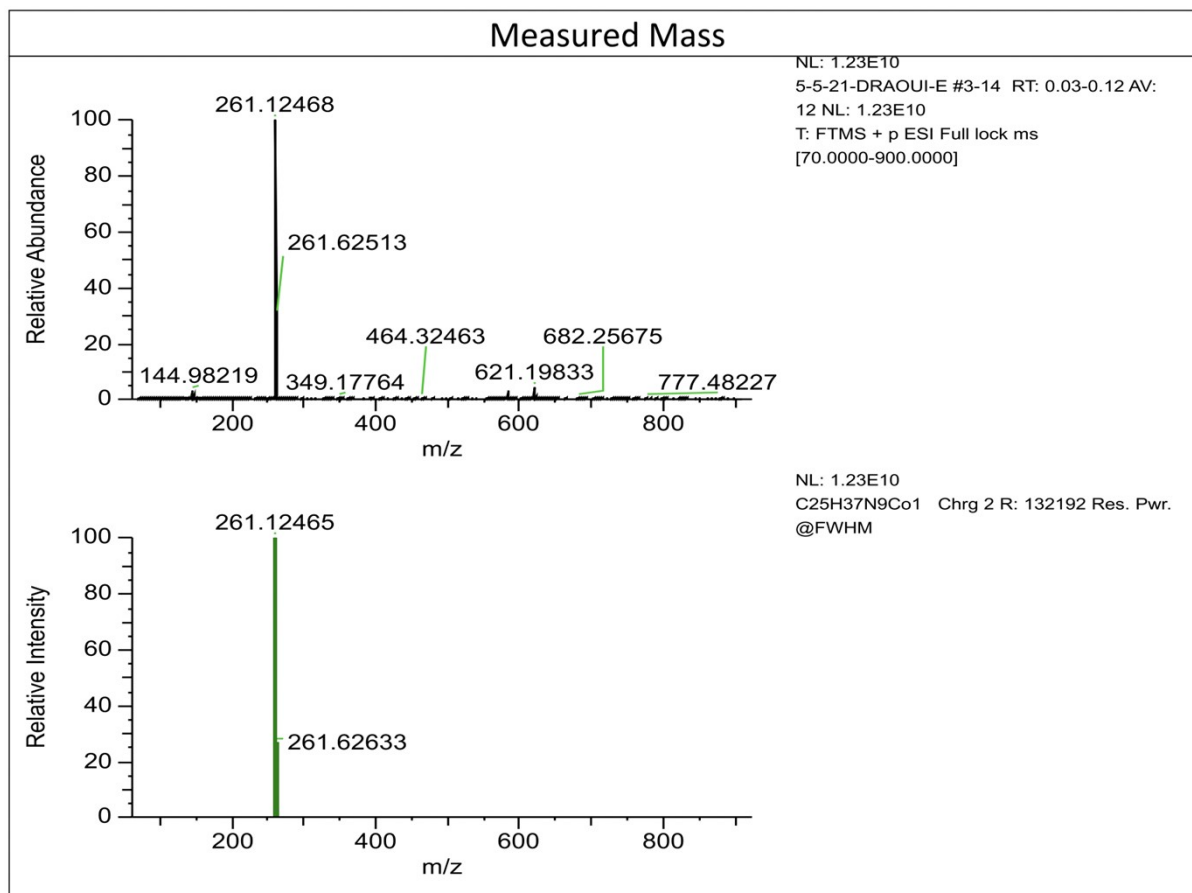

13. Elemental composition of  $CoL(CH_3OH)(H_2O)_2$ :

| Peak Mass | Display Formula          | MS Cov. [%] | Delta [ppm] | Theo. mass |
|-----------|--------------------------|-------------|-------------|------------|
| 261.12468 | $C_{25}H_{37}N_9^{59}Co$ | 99.31       | 0.13        | 261.12465  |

5-5-21-DRAOUI-E #7-24 RT: 0.06-0.21 AV: 18 NL: 4.95E8  
T: FTMS + p ESI Full lock ms [70.0000-900.0000]

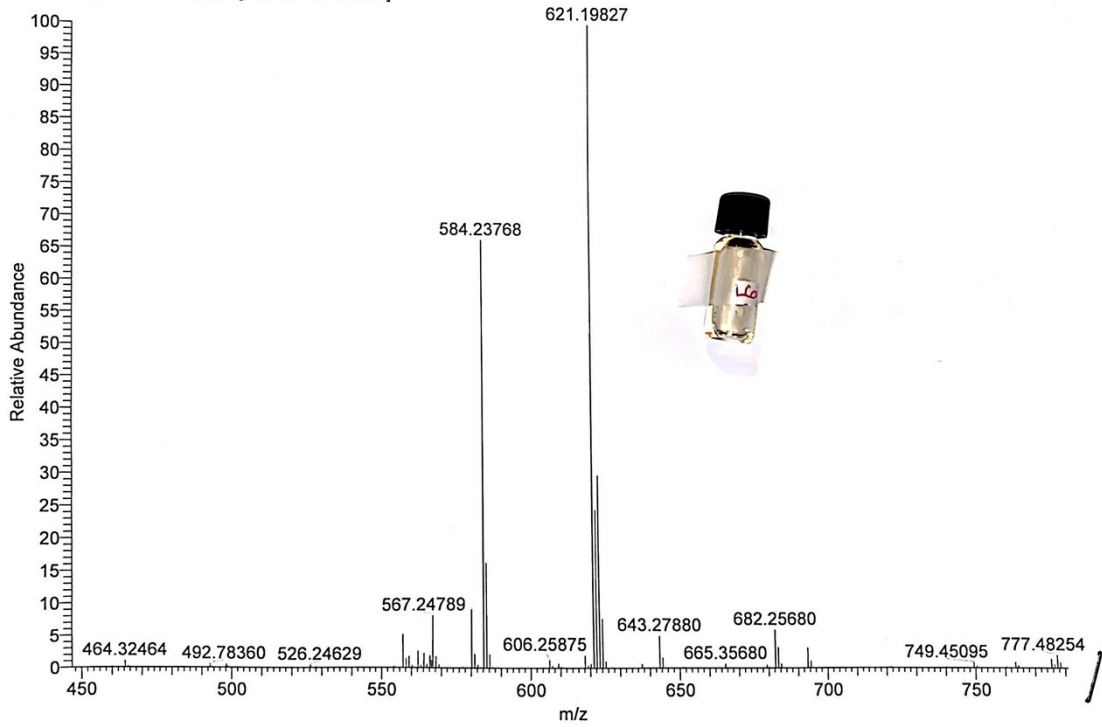

05/05/21 11:31:25

C26H43CoN9O2

D:\DATA\5-5-21-DRAOUI-E  
C26H43CoN9O2 LCo DRAOUI GARCIA

5-5-21-DRAOUI-E #2-30 RT: 0.02-0.26 AV: 29 NL: 1.21E10  
T: FTMS + p ESI Full lock ms [70.0000-900.0000]  
261.12464

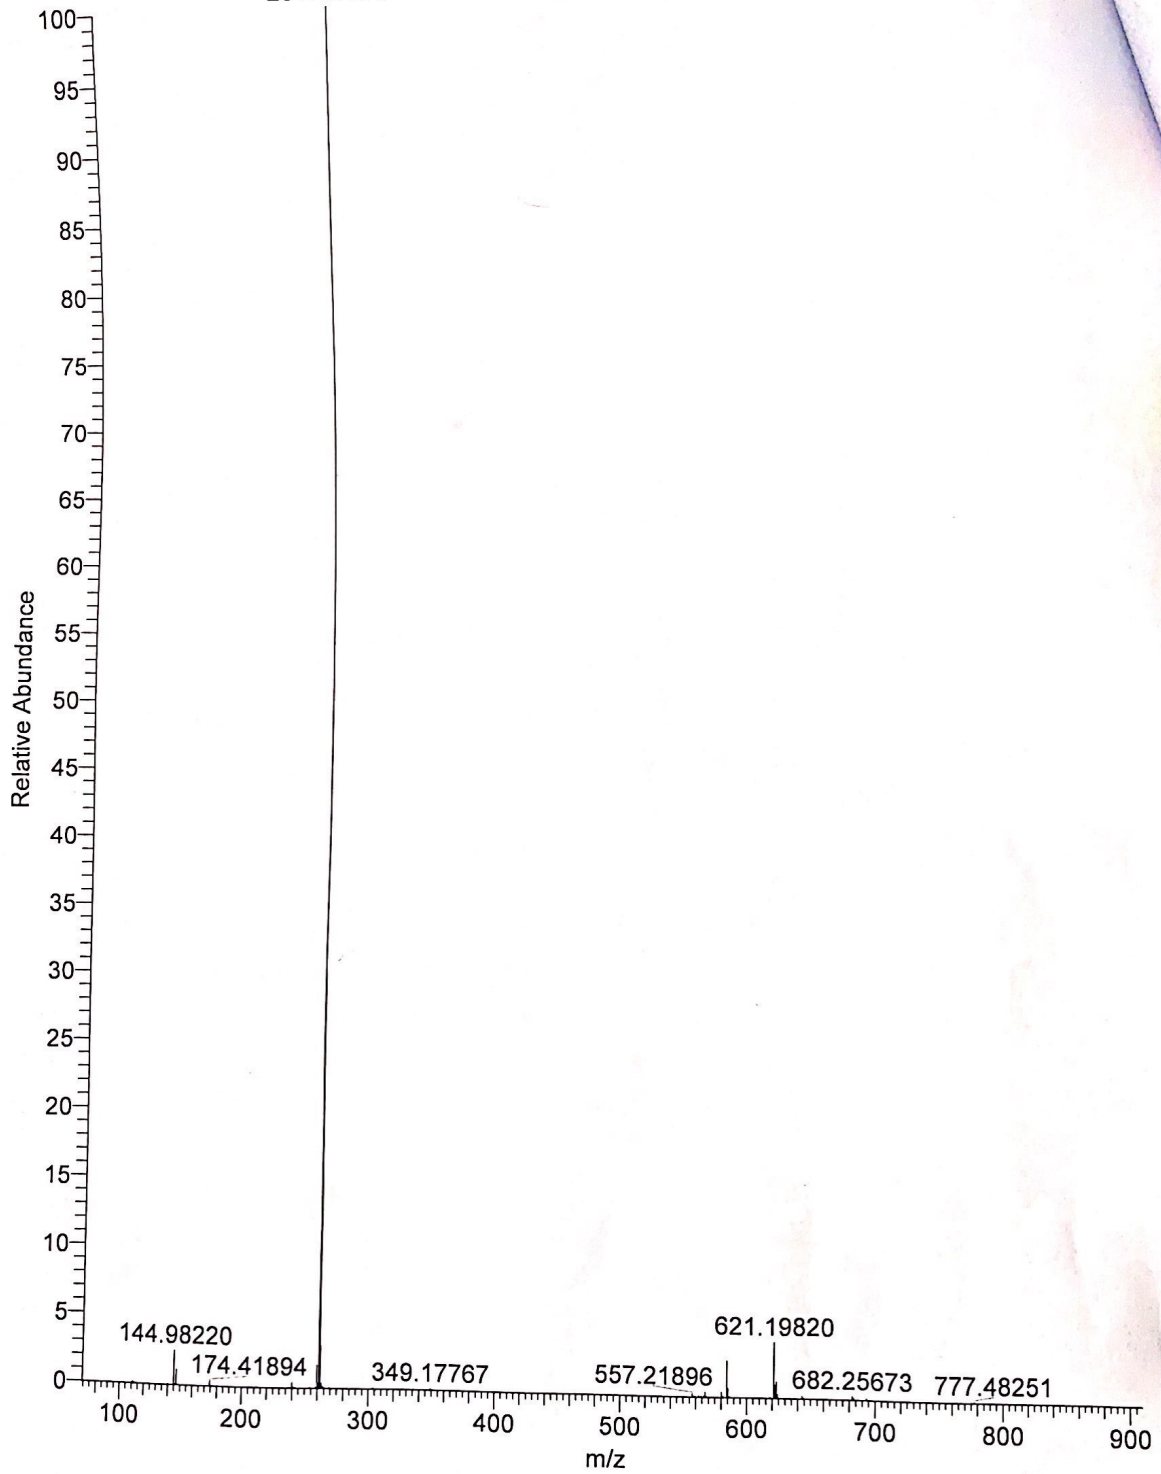

Supplement: d2ra03414j1.pdf [file d2ra03414j1.pdf]
